# Supplementary material for: Possible stochastic sex determination in Bursaphelenchus nematodes
Source: Springer Nature journal article supplement (doi:10.1038/s41467-022-30173-2), 2022-05-11
Supplement: MOESM2 [file 41467_2022_30173_MOESM2_ESM.pdf]

### Description of Additional Supplementary Files

File Name: Supplementary Data 1

Description: Differentially expressed genes in *B. okinawaensis* wild-type hermaphrodites relative to wild-type males. Genes upregulated in the hermaphrodites or males are defined as feminine genes (highlighted in red) and masculine genes (highlighted in blue), respectively.

File Name: Supplementary Data 2

Description: Significantly enriched GO terms for genes that were differentially expressed (DEs) between the wild-type females and males.

File Name: Supplementary Data 3

Description: Differentially expressed genes in *B. okinawaensis* sy867 hermaphrodites (+/+, *tra*/+) relative to wild-type hermaphrodites. Feminine genes and masculine genes are highlighted in red and blue, respectively.

File Name: Supplementary Data 4

Description: Significantly enriched GO terms for genes that were differentially expressed (DEs) between the wild-type hermaphrodite and *tra*-mutant (sy867) hermaphrodite (+/+, *tra*/+).

File Name: Supplementary Data 5

Description: Differentially expressed genes in *B. okinawaensis* sy867 males (*tra*/*tra*) relative to wild-type males. Feminine genes and masculine genes are highlighted in red and blue, respectively.

File Name: Supplementary Data 6

Description: Significantly enriched GO terms for genes that were differentially expressed (DEs) between the wild-type male and *tra*-mutant (sy867) male (*tra*/*tra*).

File Name: Supplementary Data 7

Description: Cluster 2 gene list in Figure 6d.

File Name: Supplementary Data 8

Description: Cluster 5 gene list in Figure 6d.
