# Supplementary material for: Possible stochastic sex determination in Bursaphelenchus nematodes
Source: Nat Commun. 2022 May 11;13:2574. doi: 10.1038/s41467-022-30173-2 (PMC9095866; doi:10.1038/s41467-022-30173-2)
Supplement: Supplementary file 5 — Supplementary Data 3 [file 41467_2022_30173_MOESM5_ESM.xlsx]

## Sheet: F_DEs
Supplmentary Data 3. Differentially expressed genes in B. okinawaensis sy867 hermaphrodites (+/+, tra/+) (sy867Hm) relative to wildtype hermaphrodites (WtHm). Feminine genes and masculine genes are highlighted in red and blue, respectively.
GeneID	Comparison		logFC	logCPM	PValue	FDR	Gene Description	pFam domains	gene type	CPM in replicate samples
										WtHm 1	WtHm 2	WtHm 3	WtMl 1	WtMl 2	WtMl 3	sy867Ml 1	sy867Ml 2	sy867Ml 3	sy867Hm 1	sy867Hm 2	sy867Hm 3
BOKJ_0232900.1	sy867Hm	WtHm	5.2168	2.84493	7.89292e-09	1.45973e-07	Protein of unknown function (DUF3050)	DUF3050		1.23756	0	0.163359	51.9306	0	0.363481	16.9609	15.7867	4.07106	36.3664	12.91	2.62305
BOKJ_0780800.1	sy867Hm	WtHm	5.14736	2.17231	1.47876e-09	3.22531e-08				0.0810833	0.0877518	0.130715	1666.63	1970.29	2294.31	1964.53	2285.92	1864	0.62872	1.11279	7.14037
BOKJ_0558800.1	sy867Hm	WtHm	4.68545	0.237816	8.5663e-07	9.66213e-06				0.298533	0.326116	0	337.305	582.021	707.899	2144.12	2082.69	1981.86	0.93421	1.78249	7.23043
BOKJ_0610500.1	sy867Hm	WtHm	4.02818	0.304395	5.59645e-12	1.9816e-10				0	0	0	0	0	0	0	0.658726	0	0	0.766667	0
BOKJ_0249900.1	sy867Hm	WtHm	3.77341	2.29983	8.28617e-21	9.46061e-19				0	0	0	0	0	0	2.69492	2.82207	1.4844	0.959418	1.08248	0.689797
BOKJ_0337600.1	sy867Hm	WtHm	3.74823	-0.193386	4.99152e-09	9.764e-08	Moulting cycle	-	Masculine	0.0452965	0.0977227	0	0.700229	0.609401	0.640975	0.47657	0.851056	0.822346	0.580356	0.56672	0.580977
BOKJ_1295300.1	sy867Hm	WtHm	3.67715	0.748665	1.03429e-06	1.12904e-05				0.026576	0.0093773	0.0497769	17.5557	32.7387	25.9111	127.946	137.321	108.199	0.118579	0.155486	0.592003
BOKJ_0063900.1	sy867Hm	WtHm	3.52376	1.06646	4.68933e-13	1.99502e-11	C-type lectin (CTL) or carbohydrate-recognition domain (CRD)	Lectin_C		1.00073	1.68491	0	2.70342	6.70812	3.18567	2.46983	3.32176	3.69405	1.78248	3.19277	1.48401
BOKJ_0737600.1	sy867Hm	WtHm	3.39038	-0.217308	6.95947e-08	1.04663e-06	guanylate cyclase	ANF_receptor,Guanylate_cyc,Pkinase_Tyr		0.104302	0	0.0393927	0	0	0	0.0914451	0.061433	0.102901	0.424949	0.484555	0.345732
BOKJ_1402500.1	sy867Hm	WtHm	3.35987	1.42617	2.70932e-14	1.40345e-12	structural constituent of cuticle	Collagen		0.362724	0	0	1.29508	0	1.37322	2.02349	2.34909	2.15889	0.561074	0.48975	0.472138
BOKJ_0292900.1	sy867Hm	WtHm	3.33699	1.00316	6.39562e-12	2.24328e-10	DB module	DB		0.588685	0.673502	0	0	1.60001	0	0.158815	0.193777	0.153962	0	0	0
BOKJ_0157100.1	sy867Hm	WtHm	3.32209	1.33234	6.19247e-14	2.89906e-12				0	0	0	0	0	0	1.51325	0	0	0	0	0
BOKJ_1005000.1	sy867Hm	WtHm	3.30851	0.901044	1.82973e-09	3.89959e-08				0	0	0	0	0	0	5.75679	3.90182	4.66595	0	1.79811	0.853134
BOKJ_0781100.1	sy867Hm	WtHm	3.30088	0.664928	1.24734e-05	0.000103657				0.0529298	0.0976882	0.042988	253.009	272.399	303.731	275.846	328.849	284.346	0.210105	0.275863	1.29371
BOKJ_0928900.1	sy867Hm	WtHm	3.28599	5.65099	1.43063e-41	7.62253e-39				126.18	24.9905	58.669	1464.9	1406.98	731.272	2520.14	2749.28	1329.96	2602.15	1727.41	2287.21
BOKJ_1223300.1	sy867Hm	WtHm	3.26739	1.40802	0.000132685	0.000787592	Serpentine type 7TM GPCR chemoreceptor Srd	7TM_GPCR_Srd	Masculine	0.996945	0.491814	0.38828	1473.15	1847.57	1881.74	3236.07	3063.4	2696.17	1.14183	1.56677	13.9414
BOKJ_1431000.1	sy867Hm	WtHm	3.10485	2.58836	1.7758e-14	9.59878e-13				33.8562	6.68478	6.45458	0	0	0	70.4209	66.714	62.5704	248.132	229.811	213.834
BOKJ_0933000.1	sy867Hm	WtHm	3.03256	0.588548	1.13715e-07	1.61262e-06				0	0	6.33951	14.1803	0	0	9.28411	12.6047	8.61587	10.3905	11.5184	8.26105
BOKJ_0395500.1	sy867Hm	WtHm	2.97427	1.39535	1.08383e-10	2.97229e-09				0	0	0	0	0	0	0	0	0.655651	0.845084	1.29321	0
BOKJ_0561600.1	sy867Hm	WtHm	2.88317	0.638651	1.43303e-09	3.15014e-08	Dimerisation domain of Ca+-activated chloride-channel, anoctamin	Anoctamin		11.7361	0	0	0	0	0	169.547	146.004	165.867	62.0282	52.9045	59.1921
BOKJ_1465600.1	sy867Hm	WtHm	2.79661	6.41921	1.30992e-45	8.14262e-43	Elongation factor G, domain IV	EFG_II,EFG_IV,GTP_EFTU,GTP_EFTU_D2		6.40284	4.65739	4.44334	4.86089	4.08936	6.03278	40.5742	38.0046	40.6319	42.1746	41.3915	38.7867
BOKJ_0331400.1	sy867Hm	WtHm	2.78115	1.05373	8.87276e-08	1.29774e-06	Belongs to the cation transport ATPase (P-type) (TC 3.A.3) family	E1-E2_ATPase		13.0979	9.64809	0	0	0	0	20.0007	32.8074	23.3427	48.9652	44.2798	50.206
BOKJ_1053800.1	sy867Hm	WtHm	2.70548	5.22412	3.16951e-29	7.38826e-27				12.7798	5.87191	6.94018	9.41159	2.20066	11.2031	329.387	377.189	331.182	238.186	141.795	222.098
BOKJ_1212800.1	sy867Hm	WtHm	2.6774	1.87297	7.29798e-11	2.06205e-09	Belongs to the MIP aquaporin (TC 1.A.8) family	MIP	Masculine	4.49868	0.990209	1.40733	20.6311	41.2049	17.3875	28.4788	17.8497	29.8237	16.3138	14.126	15.9768
BOKJ_0258900.1	sy867Hm	WtHm	2.67475	-0.0982778	4.01822e-06	3.83428e-05	Calcium-binding protein	-		1.4889	0.349379	0	2.1271	1.56774	0	1.35837	1.82023	2.41357	0.647665	1.36717	0.603136
BOKJ_1471700.1	sy867Hm	WtHm	2.65615	-0.410318	7.82402e-06	6.94786e-05				0	7.54337	0	0	0	0	71.8345	54.228	56.4433	14.5651	14.7442	10.1961
BOKJ_0572600.1	sy867Hm	WtHm	2.62213	0.33653	1.25322e-07	1.75938e-06				4.65689	8.83228	0	0	0	0	55.2522	78.0334	70.6669	51.1735	54.7426	40.2331
BOKJ_1205800.1	sy867Hm	WtHm	2.56459	-0.325793	3.13535e-05	0.000229591	glutathione transferase activity	GST_C_3	Masculine	0.374258	0.868485	0	14.6234	24.5778	5.59594	5.14903	6.67287	4.48862	1.27693	2.08832	3.01584
BOKJ_0988500.1	sy867Hm	WtHm	2.55429	0.173432	6.04859e-07	7.0745e-06	BAR domain	-		3.70389	5.47351	0	0	0	9.34213	17.6101	19.4679	16.4988	14.7075	7.48732	8.13895
BOKJ_0023000.1	sy867Hm	WtHm	2.52892	2.8828	2.47988e-14	1.30269e-12				38.3632	9.98034	0	0	0	0	69.6792	62.7437	70.3172	221.225	257.037	178.254
BOKJ_0256800.1	sy867Hm	WtHm	2.5063	-0.208946	9.46898e-06	8.17503e-05				0.249059	0.134651	0.280527	0	0	0.148123	1.84459	0.767731	1.21824	1.48442	0.930695	1.45395
BOKJ_0303100.1	sy867Hm	WtHm	2.49436	5.76081	2.36396e-19	2.41298e-17				0	0	0	0	0	0	112.791	109.018	178.45	0	0	0
BOKJ_0329300.1	sy867Hm	WtHm	2.49003	5.62954	1.10671e-35	3.99452e-33				160.818	89.8762	129.65	25.5304	39.812	14.4847	783.457	668.608	774.659	855.303	839.051	947.508
BOKJ_1375200.1	sy867Hm	WtHm	2.48383	0.717243	2.17842e-07	2.85748e-06	Putative zinc finger in N-recognin (UBR box)	zf-UBR		0	4.18469	0	0	9.19222	0	21.8366	34.9631	30.026	28.4494	21.4287	21.802
BOKJ_0868900.1	sy867Hm	WtHm	2.48234	0.562431	6.92594e-08	1.0444e-06				0	0	0	0	0	0	0	0.396613	0	0.393559	0	0.885219
BOKJ_0796000.1	sy867Hm	WtHm	2.47826	1.33634	9.94782e-07	1.09553e-05				1.88737	0.768119	1.11416	0	0	0	0.322888	0.915616	0.858663	3.12402	4.00044	7.88787
BOKJ_1072700.1	sy867Hm	WtHm	2.46575	-0.37978	3.93087e-05	0.000278723				0.726827	0	0	0	0	0	6.01189	6.24713	5.66323	0.227672	0	0.255602
BOKJ_0351600.1	sy867Hm	WtHm	2.44353	4.38731	0.000173744	0.000992861	oxygen binding	Globin		35.0011	2.93994	4.66096	28.4725	0	1.63159	236.259	271.618	178.444	169.44	101.014	105.987
BOKJ_0588800.1	sy867Hm	WtHm	2.4058	0.359988	1.42106e-05	0.000115976				0	0	0	0	0	0	43.2775	37.1126	28.7225	35.1933	44.1262	40.0679
BOKJ_1000200.1	sy867Hm	WtHm	2.38684	-0.451312	6.85798e-05	0.000448999				0.867578	0.624022	0.99954	105.595	107.152	65.1404	88.2421	74.5916	84.8973	1.84698	2.93414	3.51855
BOKJ_0559900.1	sy867Hm	WtHm	2.3717	3.90156	3.04132e-18	2.63793e-16	Belongs to the UDP-glycosyltransferase family	UDPGT	Masculine	5.15737	6.05109	6.11985	53.816	50.624	51.7558	20.287	30.2058	17.8068	27.0314	18.9275	28.3045
BOKJ_0320400.1	sy867Hm	WtHm	2.3014	2.36357	4.14031e-09	8.28729e-08				150.98	157.173	42.7709	0	186.319	0	258.84	236.173	242.503	292.566	296.803	218.886
BOKJ_0246500.1	sy867Hm	WtHm	2.29786	2.5107	4.66537e-10	1.13976e-08	occurring C-terminal to leucine-rich repeats	LRR_4,LRR_8		0.609893	1.22551	0.211122	1.23338	0.353153	0.940999	1.74057	1.81939	1.52741	0.665444	0.404523	0.495622
BOKJ_1156800.1	sy867Hm	WtHm	2.29725	-0.0273515	1.99104e-05	0.000155897				0.329805	1.55262	0.405853	8.52222	0	2.51865	34.5616	24.7587	32.7641	5.96052	3.54042	4.1393
BOKJ_1187000.1	sy867Hm	WtHm	2.27184	1.39956	6.36787e-09	1.20763e-07				11.6081	4.3693	4.57055	0	0	3.25781	26.9504	30.7222	29.3771	26.2531	30.4441	26.6494
BOKJ_0556800.1	sy867Hm	WtHm	2.24633	0.119966	1.23501e-05	0.000102938	RNA uridylyltransferase activity	-	Masculine	0.55771	0	0.165384	3.84035	4.82285	3.19957	4.08099	2.83224	3.73761	1.95199	2.48719	2.26971
BOKJ_0630200.1	sy867Hm	WtHm	2.22355	0.363811	7.37277e-06	6.58371e-05				0.392372	0	1.0272	0	0	0	11.22	9.85076	10.1651	2.37004	5.72829	3.18319
BOKJ_1105200.1	sy867Hm	WtHm	2.18768	0.250552	9.92281e-06	8.49474e-05				1.50392	4.17745	2.09493	0	0	0	5.05014	4.00782	4.38262	5.98994	6.49821	7.55931
BOKJ_1133400.1	sy867Hm	WtHm	2.16603	4.21379	1.86407e-17	1.3892e-15				181.437	177.86	124.94	77.0885	166.83	57.4501	443.435	397.425	421.584	464.407	518.153	524.753
BOKJ_1133500.1	sy867Hm	WtHm	2.1658	4.89594	5.51738e-25	9.21403e-23	-	-		144.682	127.296	121.039	130.975	285.763	253.187	367.991	352.39	415.016	446.967	480.076	433.965
BOKJ_0483700.1	sy867Hm	WtHm	2.15237	2.96022	3.57076e-11	1.08274e-09				56.2748	83.7534	191.237	61.5234	0	0	300.219	219.902	297.433	315.171	392.972	341.975
BOKJ_1463200.1	sy867Hm	WtHm	2.1489	1.02969	2.10789e-07	2.77147e-06	Required for the formation of a threonylcarbamoyl group on adenosine at position 37 (t(6)A37) in mitochondrial tRNAs that read codons beginning with adenine. Probably involved in the transfer of the threonylcarbamoyl moiety of threonylcarbamoyl-AMP (TC-AMP) to the N6 group of A37	Peptidase_M22		12.9422	19.1788	11.594	27.0773	41.9041	16.3694	25.2294	28.0752	31.7591	40.3729	32.5082	31.2618
BOKJ_0250200.1	sy867Hm	WtHm	2.14192	0.618404	2.5294e-06	2.53371e-05				1.55651	1.43398	0	472.518	565.237	555.707	567.753	503.997	539.572	3.66381	4.37722	4.00477
BOKJ_0726400.1	sy867Hm	WtHm	2.13322	5.21521	5.9316e-06	5.40902e-05				42.6595	38.775	32.1441	259.374	274.058	211.563	94.0518	208.705	111.545	204.278	29.5718	153.529
BOKJ_1055600.1	sy867Hm	WtHm	2.13235	0.827274	1.00123e-06	1.09939e-05				2.12649	2.12243	3.02244	21.7639	25.0947	24.4271	65.8278	60.2052	68.3392	10.5228	8.89124	12.1403
BOKJ_0350600.1	sy867Hm	WtHm	2.09238	5.29732	8.21976e-12	2.82119e-10	Lipase (class 3)	Lipase_3		42.6696	16.937	27.2612	21.1509	14.1435	9.79886	98.5583	123	92.1606	110.441	137.019	150.295
BOKJ_1443300.1	sy867Hm	WtHm	2.08706	3.18557	2.3026e-05	0.000177315				0	34.051	41.0699	0	0	0	280.491	220.875	224.401	373.013	282.079	366.125
BOKJ_0795900.1	sy867Hm	WtHm	2.05959	1.4978	4.98839e-07	5.9441e-06				0.507971	0.598466	0.630365	0	0	0	1.13548	0.759918	1.62558	5.76189	9.61716	12.3397
BOKJ_1394200.1	sy867Hm	WtHm	2.05877	2.58812	1.46153e-09	3.19397e-08	RNA recognition motif. (a.k.a. RRM, RBD, or RNP domain)	-		12.8268	18.7865	5.38902	0	0	0	27.489	23.7609	27.8144	51.9643	49.912	49.3037
BOKJ_0716800.1	sy867Hm	WtHm	2.05261	4.10352	1.10437e-16	7.48897e-15	Acetyltransferase (GNAT) family	Acetyltransf_1		88.4625	133.593	112.472	73.0613	26.741	48.8526	247.284	238.796	254.008	234.448	252.832	252.306
BOKJ_0199700.1	sy867Hm	WtHm	2.04491	-0.0337435	9.7853e-05	0.000611322				2.39755	2.06992	0	43.5318	0	0	32.8894	27.1033	34.0396	7.24373	6.94192	5.9047
BOKJ_1167000.1	sy867Hm	WtHm	2.00109	-0.0587132	0.000113691	0.000694372				0	0.724019	1.50376	12.5474	0	18.366	48.821	42.2613	51.3404	4.45726	4.28307	4.58645
BOKJ_0862000.1	sy867Hm	WtHm	-2.004	3.85369	2.07239e-07	2.73765e-06	Belongs to the glycosyl hydrolase 31 family	Gal_mutarotas_2,Glyco_hydro_31,NtCtMGAM_N		19.4828	5.47563	10.967	5.28487	8.62152	9.38585	35.4925	27.5908	34.3681	1.9932	2.54333	2.69686
BOKJ_1405800.1	sy867Hm	WtHm	-2.00922	-0.10547	0.000587127	0.00279547	chitin binding	Glyco_hydro_18		1.70058	0.627073	3.73121	1.1645	1.66474	0	0.281688	0.293468	0.899348	0.29473	0.482034	0.531114
BOKJ_1219500.1	sy867Hm	WtHm	-2.00973	2.01068	0.000920484	0.00407255				11.124	29.5532	7.28375	140.323	193.141	30.4834	64.2363	71.367	51.4902	0.950157	6.58881	1.72658
BOKJ_1445200.1	sy867Hm	WtHm	-2.01374	7.50356	1.21487e-09	2.73505e-08	Belongs to the type IV collagen family	C4,Collagen		58.5911	16.3229	31.0159	6.19551	12.9422	16.9747	50.0438	49.8015	54.8909	9.27808	8.25468	10.3917
BOKJ_0858100.1	sy867Hm	WtHm	-2.01402	1.35756	0.000156832	0.000910366				2.21691	0.886661	2.28371	139.507	146.186	167.523	198.568	167.692	222.871	0.231433	0.217347	0.677747
BOKJ_0980100.1	sy867Hm	WtHm	-2.01531	6.47598	1.57844e-16	1.06393e-14	aspartic-type endopeptidase activity	Asp		168.859	240.23	213.462	107.522	301.976	107.141	265.252	216.905	229.841	27.1505	57.7949	37.4517
BOKJ_0091500.1	sy867Hm	WtHm	-2.01543	0.777772	1.01418e-05	8.66237e-05	TK FER protein kinase	Pkinase_Tyr,SH2	Masculine	5.1978	2.17323	3.04339	134.624	137.624	137.584	216.237	187.052	227.535	0.822868	0.467575	0.771351
BOKJ_1243100.1	sy867Hm	WtHm	-2.01801	3.01881	1.51628e-10	4.05877e-09	transcription, DNA-templated	zf-C2H2		19.7929	30.3891	37.1227	45.3782	49.104	50.8867	16.2724	15.6845	16.5996	5.70753	4.96673	6.06189
BOKJ_1300100.1	sy867Hm	WtHm	-2.02544	0.994275	3.6423e-07	4.48335e-06	(R)-3-amino-2-methylpropionate-pyruvate transaminase activity	Aminotran_3		5.00551	3.62664	5.50661	4.64977	3.56274	0.90886	2.88103	2.92158	2.94622	0.722142	0.819208	1.08481
BOKJ_0799900.1	sy867Hm	WtHm	-2.02592	4.04957	5.03611e-08	7.86998e-07	collagen	Collagen		38.3236	15.4258	24.3314	4.36245	13.365	27.2038	24.4171	22.0634	20.5411	3.84993	5.75872	7.86159
BOKJ_0761200.1	sy867Hm	WtHm	-2.02903	1.71678	2.06138e-07	2.72634e-06	L-pipecolate oxidase activity	DAO		13.6994	6.7833	8.84604	8.07788	4.99826	9.50089	6.07033	3.79218	4.49152	1.46663	1.82502	2.02237
BOKJ_1294600.1	sy867Hm	WtHm	-2.03127	-0.482635	6.72298e-05	0.000441193	-	-		2.42585	5.50132	5.94234	5.13051	15.9543	29.8609	5.75835	4.28992	5.04374	1.70081	2.35983	1.23804
BOKJ_0260000.1	sy867Hm	WtHm	-2.03136	0.580073	4.57094e-05	0.000316682	Lissencephaly type-1-like homology motif	WD40		1.63577	7.51021	0.889855	2.19414	16.8386	1.38337	0.478248	0.487722	0.400295	0.614817	0.358158	0.271556
BOKJ_1046800.1	sy867Hm	WtHm	-2.03743	1.8194	9.19548e-07	1.02376e-05				9.64419	3.61725	6.11166	390.597	340.835	314.826	216.692	197.293	231.157	1.00954	1.28435	1.63701
BOKJ_1316900.1	sy867Hm	WtHm	-2.04134	6.30342	2.63081e-13	1.14985e-11	Glycoside hydrolase family 45 protein	Glyco_hydro_45	Masculine	407.403	360.809	344.967	1031.9	3774.9	1339.1	246.556	435.241	210.177	78.8322	35.7753	90.657
BOKJ_0726200.1	sy867Hm	WtHm	-2.04158	2.60995	5.7088e-07	6.73085e-06				18.1354	9.35558	7.92082	402.838	411.625	333.078	899.45	717.866	879.973	5.28631	5.40475	3.16779
BOKJ_1245800.1	sy867Hm	WtHm	-2.04209	4.94738	2.05866e-18	1.87271e-16	PHR domain	BACK,PHR		18.5069	28.4148	28.4261	64.1147	62.2116	34.5284	7.99758	9.18586	8.47401	6.15412	5.3598	4.78709
BOKJ_0315500.1	sy867Hm	WtHm	-2.04283	1.70826	3.41409e-05	0.000245819	structural constituent of cuticle	Col_cuticle_N,Collagen	Feminine	5.07655	1.78852	8.36465	0.342169	0	0	5.71002	0.244934	2.12633	1.4384	0.658277	1.1643
BOKJ_1202500.1	sy867Hm	WtHm	-2.0459	1.45219	8.00094e-05	0.000513023				5.61558	2.28435	5.75774	311.354	274.311	315.712	356.588	316.447	376.054	0.431653	0.702468	1.6754
BOKJ_0136300.1	sy867Hm	WtHm	-2.04939	8.48064	1.99022e-23	2.7492e-21	transmembrane transport	MFS_1		278.249	296.353	318.168	223.235	212.425	244.615	172.766	188.042	146.208	67.5969	44.7002	78.1888
BOKJ_1436300.1	sy867Hm	WtHm	-2.04944	2.3414	5.72631e-08	8.89884e-07				7.6227	6.97828	6.80791	0	0	0	173.681	190.145	114.873	4.25314	11.6145	7.55207
BOKJ_1329600.1	sy867Hm	WtHm	-2.05046	4.18837	1.65913e-16	1.11162e-14	histone acetyltransferase activity	zf-TAZ		26.7482	20.673	22.537	18.4637	13.8757	15.8659	12.4575	9.66681	17.2001	5.96576	5.23687	4.98176
BOKJ_0828600.1	sy867Hm	WtHm	-2.05256	3.2628	0.000294601	0.00157116	structural constituent of cuticle	-	Feminine	21.6514	2.35443	31.0497	1.6567	1.86462	1.3848	1.86322	1.81691	1.66005	4.29898	3.88165	3.12583
BOKJ_0807300.1	sy867Hm	WtHm	-2.05283	2.78725	5.11799e-12	1.82956e-10				32.3192	34.9031	25.6427	42.4432	8.51933	10.1298	26.4922	24.0538	27.3	7.94956	9.21298	8.64911
BOKJ_0625300.1	sy867Hm	WtHm	-2.0536	3.70481	3.88185e-14	1.9304e-12				32.4881	41.0447	41.3049	118.684	48.8078	55.8473	52.5883	50.0733	52.5817	13.6735	14.0939	16.9784
BOKJ_0433100.1	sy867Hm	WtHm	-2.05693	7.12503	1.31628e-09	2.92801e-08				370.644	455.752	572.713	125.633	449.187	219.454	119.257	266.147	124.716	104.748	34.3504	121.955
BOKJ_0997900.1	sy867Hm	WtHm	-2.05762	1.47615	2.98062e-05	0.000221009				13.4535	7.69204	9.77858	1180.4	1027.5	1095.25	1030.36	870.997	1106.61	1.40096	1.34361	4.43727
BOKJ_0120000.1	sy867Hm	WtHm	-2.05782	0.727773	9.22477e-06	8.01847e-05	MSP (Major sperm protein) domain	-	Masculine	0	26.8782	0	198.825	232.013	133.836	1508.78	1395.24	1741.23	5.48612	6.25689	11.2433
BOKJ_1269200.1	sy867Hm	WtHm	-2.06237	0.185348	5.57037e-05	0.000375916	-	-		8.78203	4.75601	7.62402	33.7098	10.8642	3.37049	8.44748	12.711	9.14722	2.31343	1.30108	2.01424
BOKJ_1201800.1	sy867Hm	WtHm	-2.06752	0.807293	0.000946592	0.00417478				2.24308	0.575593	4.34351	9.50751	8.25294	5.62956	5.97144	5.13018	5.34476	0.392813	0.769405	0.646165
BOKJ_0256100.1	sy867Hm	WtHm	-2.07631	0.960848	0.000957274	0.00421028	protein tyrosine phosphatase activity	Y_phosphatase	Masculine	3.7313	0.979416	3.56125	170.747	172.927	137.792	208.691	187.258	219.677	0.210786	0.319132	1.22605
BOKJ_1423700.1	sy867Hm	WtHm	-2.07721	6.67193	2.5531e-18	2.24934e-16	Core component of nucleosome. Nucleosomes wrap and compact DNA into chromatin, limiting DNA accessibility to the cellular machineries which require DNA as a template. Histones thereby play a central role in transcription regulation, DNA repair, DNA replication and chromosomal stability. DNA accessibility is regulated via a complex set of post-translational modifications of histones, also called h…	CENP-T_C		899.697	1215.74	1381.96	367.716	464.771	380.408	98.9255	140.723	133.164	398.575	225.283	208.934
BOKJ_0381900.1	sy867Hm	WtHm	-2.07914	0.150433	1.50982e-06	1.57883e-05	-	-		5.08407	4.44889	4.71218	2.07853	2.83933	1.7242	1.63966	2.84506	3.21231	0.635044	0.795828	1.18627
BOKJ_1372300.1	sy867Hm	WtHm	-2.08035	2.20184	1.97522e-07	2.632e-06	Haloacid dehalogenase-like hydrolase	HAD_2	Masculine	17.3044	6.94493	14.2875	298.342	278.266	230.029	509.527	408.718	520.234	2.67316	2.88586	2.72824
BOKJ_0817200.1	sy867Hm	WtHm	-2.0837	5.88918	3.2584e-32	1.04166e-29	-	-	Masculine	93.8356	107.227	97.5239	332.687	629.985	463.987	51.3438	65.6248	44.7576	16.0711	17.9447	19.9487
BOKJ_1450900.1	sy867Hm	WtHm	-2.08576	1.08214	0.000209609	0.00116857				9.13678	1.61535	5.43918	440.139	407.12	303.046	473.754	389.695	497.801	1.02669	1.23697	2.3829
BOKJ_0620200.1	sy867Hm	WtHm	-2.09043	7.37568	6.7972e-11	1.94015e-09				504.555	612.981	843.304	142.228	705.505	346.751	179.495	445.205	205.992	147.449	74.6163	215.553
BOKJ_0514400.1	sy867Hm	WtHm	-2.09727	6.90265	2.95776e-09	6.05015e-08	regulation of muscle system process	-		268.43	74.942	103.396	125.356	246.676	290.741	111.951	127.935	118.334	31.3969	28.6893	34.6103
BOKJ_1430800.1	sy867Hm	WtHm	-2.09884	1.18835	1.76923e-06	1.83636e-05	hydrolase activity	Metallophos	Masculine	4.24729	2.38938	1.56912	86.9257	124.167	94.2489	191.394	168.413	192.072	0.852956	0.561465	0.98991
BOKJ_0886000.1	sy867Hm	WtHm	-2.10065	4.48429	1.15081e-14	6.28116e-13	acid phosphatase activity	His_Phos_2		52.7841	33.9247	56.4615	26.2509	26.9978	36.2643	19.5724	21.3507	18.1093	8.41221	11.2984	8.82964
BOKJ_1228300.1	sy867Hm	WtHm	-2.10308	2.27801	6.37694e-05	0.000421451				13.2483	4.45808	6.15746	811.34	744.431	700.756	969.346	814.734	1040.57	0.874723	1.55602	3.3463
BOKJ_1353200.1	sy867Hm	WtHm	-2.10332	4.65355	3.78689e-19	3.78317e-17				220.406	286.053	336.743	481.41	294.748	493.258	199.401	174.716	192.239	138.739	135.479	159.876
BOKJ_0807900.1	sy867Hm	WtHm	-2.10582	10.038	2.49972e-11	7.85656e-10	belongs to the malate synthase family	ICL,Malate_synthase		1171.7	372.529	573.955	314.002	520.879	306.479	672.045	750.662	690.339	169.223	124.103	136.297
BOKJ_1346000.1	sy867Hm	WtHm	-2.10722	0.79671	8.87437e-07	9.9548e-06				20.2076	6.92433	25.8007	0	0	23.5518	44.5884	33.6084	47.238	4.55315	5.70984	5.52809
BOKJ_0371600.1	sy867Hm	WtHm	-2.10815	8.98191	2.51915e-17	1.83031e-15				720.185	811.47	1191.62	285.883	1067.72	500.267	915.986	794.592	806.05	122.553	266.678	218.221
BOKJ_1198600.1	sy867Hm	WtHm	-2.10978	3.79869	7.25415e-15	3.97876e-13				53.4496	42.681	68.0878	52.1313	65.5522	52.4192	26.2127	32.4338	21.3136	13.5034	12.5324	14.3417
BOKJ_1124300.1	sy867Hm	WtHm	-2.10995	2.54677	7.60191e-09	1.41292e-07	transferase activity	GST_C_3,GST_N		41.7169	24.2249	23.6065	45.3653	22.7797	30.3507	57.8015	61.5841	53.4899	4.91115	4.82133	6.86625
BOKJ_0851300.1	sy867Hm	WtHm	-2.11305	3.86914	1.47202e-17	1.12044e-15	Homeodomain	Homeobox		37.6074	34.507	38.9427	32.872	27.9233	33.3927	18.263	19.801	16.2258	7.6064	7.51096	9.10156
BOKJ_1382300.1	sy867Hm	WtHm	-2.11395	6.11032	6.09123e-36	2.27183e-33	Domain with 2 conserved Trp (W) residues	WW		68.718	69.92	67.5387	154.271	103.193	101.856	47.0277	52.4214	48.674	15.7471	14.5995	18.298
BOKJ_1072600.1	sy867Hm	WtHm	-2.11629	10.1637	7.55939e-30	1.8796e-27	Belongs to the actin family	Actin		1068.15	635.602	782.265	1074.9	1039.98	1340.81	488.513	551.815	486.843	209.305	203.139	215.225
BOKJ_0318700.1	sy867Hm	WtHm	-2.12234	1.44307	0.00157548	0.00632281	Animal haem peroxidase	An_peroxidase,ShK		2.82322	0.196289	6.08296	0.87846	3.0527	1.57244	1.48397	1.31719	1.15533	0.509227	0.645314	0.617888
BOKJ_1124200.1	sy867Hm	WtHm	-2.13131	5.48219	5.65288e-29	1.29082e-26	Glutathione S-transferase, N-terminal domain	GST_C_3,GST_N		263.261	219.257	201.729	407.205	290.974	178.126	255.371	260.555	234.463	49.2665	44.2853	53.9303
BOKJ_0698700.1	sy867Hm	WtHm	-2.13143	1.02213	0.00021818	0.00120852				45.4102	3.63198	45.157	0	0	0	31.2765	4.97872	19.1282	4.65528	6.5607	6.32332
BOKJ_0365800.1	sy867Hm	WtHm	-2.13175	4.18866	1.19767e-10	3.27645e-09	Phytanoyl-CoA dioxygenase (PhyH)	PhyH		27.0266	72.1895	55.4344	34.7682	20.6592	28.9891	62.6692	58.8485	54.5295	10.7495	7.13135	9.91216
BOKJ_0564900.1	sy867Hm	WtHm	-2.14285	6.02331	6.46643e-21	7.52067e-19		adh_short_C2		111.476	218.63	196.668	48.602	141.976	112.149	140.092	124.39	130.897	29.8344	26.1581	31.3753
BOKJ_1231200.1	sy867Hm	WtHm	-2.1463	0.93023	0.000819176	0.00370483				20.492	7.71483	4.21454	396.464	279.469	382.236	617.125	525.14	642.756	3.87034	1.30072	1.04348
BOKJ_1185400.1	sy867Hm	WtHm	-2.14756	2.53322	1.25906e-12	5.03128e-11	Glutathione S-transferase, C-terminal domain	-		22.5264	27.5676	25.6534	0.981329	9.91432	9.07081	11.4896	10.0639	11.2344	4.64009	6.47911	6.67802
BOKJ_0043600.1	sy867Hm	WtHm	-2.14756	6.10299	8.90088e-11	2.48359e-09	Patched family	Patched	Feminine	25.9227	96.7063	53.9311	10.4751	19.1986	14.8263	33.3337	26.0214	37.2327	11.6742	11.6228	12.7274
BOKJ_1293300.1	sy867Hm	WtHm	-2.14757	8.9393	1.74751e-27	3.49159e-25	Fructose-bisphosphate aldolase	Glycolytic		817.02	839.097	1174.48	296.491	382.985	311.44	1174.65	946.074	1016.25	231.338	162.324	198.482
BOKJ_0692300.1	sy867Hm	WtHm	-2.14791	3.25787	1.07683e-13	4.91781e-12	Immunoglobulin	-		6.40429	7.30853	8.81639	6.38016	5.24791	5.80659	6.38803	6.49086	6.12889	1.48423	0.99823	1.91041
BOKJ_0591500.1	sy867Hm	WtHm	-2.1492	1.01807	2.33271e-06	2.35566e-05	serine threonine-protein phosphatase	-	Masculine	6.95512	2.60562	3.7221	264.182	205.481	272.095	357.285	297.172	377.963	0.548671	0.804969	1.47249
BOKJ_0519400.1	sy867Hm	WtHm	-2.15302	0.610398	1.82365e-06	1.88237e-05	-	-		3.95464	1.90514	4.93381	5.68537	5.46807	3.20078	6.32639	1.46919	3.63795	0.577987	0.878589	0.631835
BOKJ_0829600.1	sy867Hm	WtHm	-2.15485	0.776997	2.1689e-06	2.20216e-05				49.3662	41.0208	28.4019	2630.43	2076.97	2199.41	2068.57	1794.36	2180.41	11.0557	4.91781	7.67293
BOKJ_0468300.1	sy867Hm	WtHm	-2.15521	5.81016	1.58217e-23	2.24087e-21	FMN-dependent dehydrogenase	FMN_dh		109.777	194.29	129.638	61.1597	125.146	127.889	136.81	124.528	143.228	21.6425	26.2106	26.0226
BOKJ_0791400.1	sy867Hm	WtHm	-2.16378	-0.277874	0.000133686	0.000792272	DB module	DB		1.21841	0.557894	1.70335	0.772179	0.845783	2.74261	2.25944	1.81125	1.59579	0.296717	0.194479	0.237109
BOKJ_1331300.1	sy867Hm	WtHm	-2.16624	0.470532	4.15747e-07	5.06731e-06	PMP-22/EMP/MP20/Claudin tight junction	Claudin_2		3.48954	3.92431	3.24918	2.65019	11.0219	3.0053	6.10689	7.38635	7.47407	0.849871	0.643585	1.2345
BOKJ_0541700.1	sy867Hm	WtHm	-2.16665	6.71197	6.14735e-10	1.46754e-08				642.337	197.116	193.801	7407.85	6615.46	6623.67	10680.2	8836.43	11553.4	86.0631	71.0494	70.5362
BOKJ_0468200.1	sy867Hm	WtHm	-2.16837	2.38713	1.03128e-11	3.43424e-10	Pyridoxal-phosphate dependent enzyme	PALP		7.42852	5.87763	4.7348	4.91414	12.2231	3.82885	3.18305	3.17316	2.51281	1.71203	1.3904	1.55871
BOKJ_0530300.1	sy867Hm	WtHm	-2.17532	2.54896	0.000171131	0.000978931				3.80849	0.918189	1.83535	195.428	201.973	207.222	186.81	166.608	205.274	0.134744	0.372897	0.726662
BOKJ_0360500.1	sy867Hm	WtHm	-2.18008	0.470809	6.07494e-05	0.000404598		-	Masculine	4.32858	1.90995	2.55703	185.421	204.621	182.883	201.686	188.381	221.582	0.268533	0.403385	0.900747
BOKJ_0252100.1	sy867Hm	WtHm	-2.18183	1.32426	4.4013e-07	5.33544e-06				7.86329	26.921	30.2782	0	0	0	6.55124	10.6389	13.197	9.8756	5.56631	9.03739
BOKJ_1210400.1	sy867Hm	WtHm	-2.18237	6.27298	2.31277e-09	4.83694e-08	Central component in molecular interactions underlying sperm crawling. Forms an extensive filament system that extends from sperm villipoda, along the leading edge of the pseudopod	Motile_Sperm	Masculine	1414.25	486.122	629.075	28219.5	29812.9	29855.9	42435.4	37410	44043	201.88	140.262	183.812
BOKJ_0051600.1	sy867Hm	WtHm	-2.18446	5.40211	1.46149e-29	3.55493e-27	response to steroid hormone	Hormone_recep,zf-C4		43.8929	45.3132	47.6723	26.8726	26.8265	31.4762	31.7608	32.6808	32.1082	8.72475	9.91455	11.1788
BOKJ_0297400.1	sy867Hm	WtHm	-2.18493	0.121704	1.31318e-05	0.000108437	5' nucleotidase family	5_nucleotid		1.29505	1.55695	6.696	0.92066	1.6284	5.16133	0.210686	0.171389	2.36861	0.40898	0.339006	0.623598
BOKJ_0921400.1	sy867Hm	WtHm	-2.18733	0.25752	7.42766e-05	0.000481786				1.01452	0.381848	2.90187	0	0	0.689566	2.12204	0.528921	1.70391	0.4651	0.66743	0.713334
BOKJ_0817100.1	sy867Hm	WtHm	-2.19319	2.05247	1.10509e-09	2.51317e-08	-	-	Masculine	9.70576	6.67529	6.62754	49.4202	103.365	65.7894	5.04379	5.42792	3.95048	1.19737	1.87178	1.91295
BOKJ_1180100.1	sy867Hm	WtHm	-2.19455	5.64222	1.87113e-22	2.40645e-20	serine-type peptidase activity	Peptidase_S28		57.5333	72.5735	100.12	28.7856	67.8807	81.3681	14.6052	12.6399	14.3983	16.6887	15.3991	12.8778
BOKJ_0087300.1	sy867Hm	WtHm	-2.19598	4.50886	6.20013e-08	9.50319e-07		MFP2b	Masculine	71.403	23.3117	21.9733	991.825	929.296	939.52	1681.6	1499.11	1800.32	7.11457	6.96332	7.44327
BOKJ_1412100.1	sy867Hm	WtHm	-2.19731	-0.273218	6.5712e-06	5.9199e-05				4.94984	5.18356	2.85823	7.40976	0	15.4874	7.93974	10.0594	1.60514	0.957478	1.39485	1.77723
BOKJ_0857700.1	sy867Hm	WtHm	-2.19772	7.6523	4.82605e-22	6.06727e-20				1132.12	1935.25	2305.55	1081.32	1036.58	1437.17	412.745	391.156	372.366	219.382	277.128	310.815
BOKJ_0380500.1	sy867Hm	WtHm	-2.20126	3.80148	0.000227103	0.0012536				30.6719	21.2035	19.2876	24.7382	37.403	26.4823	1.93244	6.85843	2.17186	4.98191	0.563452	6.62291
BOKJ_0226000.1	sy867Hm	WtHm	-2.20314	1.67769	6.15401e-06	5.58e-05	Likely role in F-actin nucleation curated by B. Wickstead, Univ. of Oxford	FH2	Masculine	4.88301	1.53542	1.96664	107.675	107.449	119.636	147.62	134.318	160.696	0.426723	0.427045	0.776202
BOKJ_0759900.1	sy867Hm	WtHm	-2.20674	6.32237	1.02513e-23	1.48964e-21	Catalyzes the O-sulfation of tyrosine residues within acidic motifs of polypeptides, using 3'-phosphoadenylyl sulfate (PAPS) as cosubstrate	Sulfotransfer_3		108.874	140.514	185.713	83.4746	99.6996	119.242	141.261	120.579	131.497	21.7936	31.3975	28.4278
BOKJ_1274000.1	sy867Hm	WtHm	-2.20869	-0.391896	5.19857e-05	0.000354459	Collagen triple helix repeat (20 copies)	Collagen	Masculine	1.09427	0.619159	1.11541	0.0612848	0.828935	2.32157	9.59275	7.81779	9.24715	0.0726746	0.145232	0.220637
BOKJ_0257200.1	sy867Hm	WtHm	-2.21157	2.16452	1.98789e-06	2.035e-05	Ground-like domain	Ground-like	Masculine	7.5265	1.37078	4.31117	68.5642	47.4114	55.9769	97.2106	79.6309	98.4655	0.801975	0.735251	0.860352
BOKJ_0397300.1	sy867Hm	WtHm	-2.21189	6.64554	4.42286e-27	8.5323e-25	protein serine/threonine kinase activity	Pkinase		64.8239	111.079	66.7463	84.1272	72.5132	87.8222	61.1652	59.7328	63.8659	19.2644	19.0774	20.3149
BOKJ_0616200.1	sy867Hm	WtHm	-2.21408	0.929938	9.4492e-06	8.16426e-05	Phosphatidylinositol transfer protein	IP_trans	Masculine	4.69205	1.88525	3.7048	133.45	127.43	141.391	281.941	241.025	277.267	0.821247	0.797747	1.08333
BOKJ_0444200.1	sy867Hm	WtHm	-2.21543	4.21852	5.84238e-13	2.43919e-11	steroid hormone mediated signaling pathway	-		17.4733	39.6732	34.1719	31.3018	57.0828	21.848	11.1756	8.51751	10.1296	6.36403	4.38822	5.61717
BOKJ_0775400.1	sy867Hm	WtHm	-2.2209	5.6872	6.84187e-19	6.59946e-17	Trehalase	Trehalase		40.2544	88.3594	64.6247	13.4933	27.5902	29.0945	33.5886	33.0458	28.2509	13.2598	11.3175	12.3242
BOKJ_0662000.1	sy867Hm	WtHm	-2.23719	4.80902	1.8599e-20	2.06043e-18	Catalyzes the cofactor-independent reversible oxidation of gamma-hydroxybutyrate (GHB) to succinic semialdehyde (SSA) coupled to reduction of 2-ketoglutarate (2-KG) to D-2- hydroxyglutarate (D-2-HG). L-3-hydroxybutyrate (L-3-OHB) is also a substrate for HOT when using 2-KG as hydrogen acceptor, resulting in the formation of D-2-HG	Fe-ADH		52.6721	35.6114	44.641	69.1105	82.5067	74.4702	71.0123	69.6668	73.5033	8.62337	7.56217	8.18105
BOKJ_0219500.1	sy867Hm	WtHm	-2.2375	0.395596	3.77762e-07	4.62449e-06	endoplasmic reticulum tubular network membrane organization	TB2_DP1_HVA22	Masculine	10.0564	6.54943	10.1371	211.607	199.112	211.02	307.329	267.181	310.933	0.935889	1.59069	1.61977
BOKJ_0694600.1	sy867Hm	WtHm	-2.24873	7.39376	1.22422e-14	6.6494e-13	regulation of muscle system process	-		415.975	161.481	220.395	220.908	214.032	255.409	115.707	134.884	126.585	44.9085	46.7976	54.8572
BOKJ_0434100.1	sy867Hm	WtHm	-2.2523	7.27788	1.1235e-07	1.59529e-06				1195.21	821.924	1105.09	122.244	609.785	451.808	187.826	507.181	211.732	294.845	52.9838	301.348
BOKJ_1344200.1	sy867Hm	WtHm	-2.26059	2.67281	1.33686e-08	2.36382e-07	-	-	Masculine	13.0438	5.8925	4.36302	296.614	283.651	271.99	317.275	276.564	322.299	2.05499	1.40068	1.98254
BOKJ_0391600.1	sy867Hm	WtHm	-2.26483	3.33715	7.05616e-08	1.05833e-06	Central component in molecular interactions underlying sperm crawling. Forms an extensive filament system that extends from sperm villipoda, along the leading edge of the pseudopod	Motile_Sperm	Masculine	49.1334	19.3338	17.8051	824.628	803.851	861.264	1508.06	1279.84	1521.49	9.44235	5.43476	6.09655
BOKJ_0731900.1	sy867Hm	WtHm	-2.27006	4.9014	2.34974e-22	2.98764e-20	steroid hormone receptor activity	Hormone_recep,zf-C4		30.7149	48.8727	37.7635	36.9688	21.4953	20.7931	26.0975	24.255	32.2545	7.76242	7.99955	7.16854
BOKJ_1209600.1	sy867Hm	WtHm	-2.2779	-0.447165	0.000133442	0.000791249	Belongs to the BI1 family	Bax1-I	Masculine	3.94929	1.22079	7.17086	180.645	190.371	216.225	226.16	188.437	239.204	0.465884	0.879495	0.842949
BOKJ_0820500.1	sy867Hm	WtHm	-2.27833	6.72692	1.25899e-33	4.14318e-31				175.483	241.142	281.29	276.41	292.06	349.842	100.028	83.492	93.6821	51.4906	42.8638	44.8524
BOKJ_1086500.1	sy867Hm	WtHm	-2.29051	0.0659266	0.00036884	0.00189223	EF-hand, calcium binding motif	EF-hand_5	Feminine	1.55696	0.152551	1.41779	0	0	0.186587	0.364434	0.230607	0.213961	0.140105	0.144841	0.194847
BOKJ_0899200.1	sy867Hm	WtHm	-2.29327	2.71394	7.24475e-07	8.32253e-06	structural constituent of cuticle	Col_cuticle_N,Collagen	Masculine	9.95395	2.9436	3.0007	206.565	211.353	196.691	283.075	241.209	286.189	0.926251	1.19982	1.10727
BOKJ_0680900.1	sy867Hm	WtHm	-2.29574	5.55453	4.27538e-32	1.32881e-29	Tetrahydrofolate dehydrogenase/cyclohydrolase, catalytic domain	THF_DHG_CYH,THF_DHG_CYH_C		113.856	108.818	128.927	94.5221	60.6276	78.446	57.7944	56.3709	46.4888	24.3771	18.4192	23.6649
BOKJ_0157000.1	sy867Hm	WtHm	-2.29779	2.31393	1.49452e-07	2.0518e-06	May act as a scaffolding protein within caveolar membranes. Interacts directly with G-protein alpha subunits and can functionally regulate their activity	Caveolin		7.06435	13.7582	24.3666	15.3609	11.5167	9.91755	16.964	19.2903	30.9098	2.51971	2.7251	3.67929
BOKJ_0795100.1	sy867Hm	WtHm	-2.2986	1.90584	8.30437e-08	1.22421e-06	FFAT motif binding	Motile_Sperm	Masculine	5.03846	2.50225	4.97806	158.88	148.846	147.756	252.008	216.014	257.38	0.976621	1.24478	2.11938
BOKJ_0377200.1	sy867Hm	WtHm	-2.30784	-1.02645	9.88783e-05	0.00061582	basic region leucin zipper	bZIP_2		0.657827	0.354854	0.691017	1.57646	0.724098	0.905923	1.35843	0.9061	0.994292	0.0368997	0.126068	0.140737
BOKJ_0397000.1	sy867Hm	WtHm	-2.30937	3.44447	7.52857e-17	5.19983e-15	Nucleotide-sugar transporter	Nuc_sug_transp		28.7628	29.1232	31.3491	46.568	29.3715	14.6201	10.0791	5.74987	7.85824	5.74378	5.34531	3.93785
BOKJ_0027200.1	sy867Hm	WtHm	-2.3124	2.82889	5.71425e-05	0.000384235	Central component in molecular interactions underlying sperm crawling. Forms an extensive filament system that extends from sperm villipoda, along the leading edge of the pseudopod	Motile_Sperm	Masculine	163.332	38.9549	65.3564	4041.78	3966.95	4501.04	4810.86	3988.33	5081.34	11.1613	9.61023	24.5595
BOKJ_0699500.1	sy867Hm	WtHm	-2.31427	-0.471744	5.83238e-05	0.00039077				4.67521	0.827851	1.80357	0	0	0.954899	1.88793	1.44278	1.84869	0.526036	0.353545	0.558453
BOKJ_0804600.1	sy867Hm	WtHm	-2.3164	0.990153	0.000109391	0.000673254	Glycosyl hydrolase family 45	Glyco_hydro_45	Masculine	15.856	5.98907	5.54754	64.348	139.402	224.193	2.37841	4.81697	2.12344	2.8277	0.58154	0.982719
BOKJ_0745900.1	sy867Hm	WtHm	-2.31716	0.235189	0.00039842	0.00202449				0.615137	1.96459	2.42395	0.299113	2.06822	0.254409	2.28495	2.49806	3.0921	0.311417	0.0196849	0.282897
BOKJ_0587400.1	sy867Hm	WtHm	-2.33173	2.64768	1.26933e-09	2.83483e-08	peptidyl-prolyl cis-trans isomerase	FKBP_C		26.2971	14.8202	33.714	17.5716	28.962	22.0544	36.3504	27.1297	26.3352	2.30468	3.88389	4.24519
BOKJ_0868400.1	sy867Hm	WtHm	-2.33456	3.60716	1.13267e-05	9.56488e-05		ShK		34.7169	23.9539	25.7181	39.9737	43.8004	28.0294	2.89274	11.881	3.69474	5.53982	0.941481	7.9553
BOKJ_0695900.1	sy867Hm	WtHm	-2.3386	3.0926	2.6922e-11	8.39081e-10				130.239	64.0475	73.9914	44.4445	70.4392	81.6416	53.9537	62.2971	54.6057	10.4217	12.8254	15.185
BOKJ_0041300.1	sy867Hm	WtHm	-2.34485	3.17083	0.000293576	0.00156681				18.7906	1.44488	24.6653	0.599138	0	0.270434	0.655337	0.964202	0.920991	2.04949	2.84697	2.12409
BOKJ_1302500.1	sy867Hm	WtHm	-2.3452	4.9843	4.18824e-24	6.33274e-22				78.2124	106.11	91.293	59.0739	31.8036	34.5771	80.6614	84.2282	95.1619	28.2903	27.7844	37.8879
BOKJ_1060100.1	sy867Hm	WtHm	-2.35201	3.61459	1.54553e-12	6.08905e-11	Belongs to the peptidase C1 family	Inhibitor_I29,Peptidase_C1	Feminine	49.8833	22.0353	42.5737	4.60738	13.4576	3.85529	41.0884	32.8619	39.217	6.25221	5.45392	5.78436
BOKJ_1018400.1	sy867Hm	WtHm	-2.35315	7.34939	3.74578e-16	2.40871e-14				190.273	559.688	444.14	306.703	292.575	260.642	74.7494	66.883	89.597	50.816	67.5369	65.6117
BOKJ_1023600.1	sy867Hm	WtHm	-2.35641	2.00161	8.78556e-06	7.71599e-05	-	-		0.850428	0.220645	1.44452	0.613531	0.134383	0.124855	0.89361	0.204427	0.661441	0.158352	0.217681	0.10506
BOKJ_1157000.1	sy867Hm	WtHm	-2.3628	1.67593	4.298e-06	4.06501e-05	FFAT motif binding	Motile_Sperm	Masculine	11.084	4.14991	5.7759	331.98	294.489	305.511	533.571	478.807	560.574	0.837905	1.24731	1.43039
BOKJ_1114000.1	sy867Hm	WtHm	-2.36481	0.141248	0.000332223	0.00174028	DB module	DB		2.79363	0.506326	9.29797	0	0	0	8.96681	0.565574	0.47574	1.05324	1.0177	0.71252
BOKJ_1199800.1	sy867Hm	WtHm	-2.37391	1.35572	2.19054e-06	2.22211e-05		Pkinase_Tyr,SH2	Masculine	5.45438	1.63408	2.16804	159.757	163.46	174.57	195.426	171.813	208.542	0.313489	0.462754	0.664188
BOKJ_0820400.1	sy867Hm	WtHm	-2.3776	6.8999	6.71271e-39	3.26559e-36				191.105	278.216	282.14	402.385	347.913	426.3	107.17	93.6529	94.4255	54.4253	46.5187	53.828
BOKJ_0026800.1	sy867Hm	WtHm	-2.38455	3.48253	3.19003e-05	0.000232984	Central component in molecular interactions underlying sperm crawling. Forms an extensive filament system that extends from sperm villipoda, along the leading edge of the pseudopod	Motile_Sperm	Masculine	267.656	69.4272	68.2247	4283.13	4808.66	5213.49	6256.47	5031.75	6552.07	19.1815	13.6407	33.8328
BOKJ_1231000.1	sy867Hm	WtHm	-2.39615	4.59671	1.61077e-23	2.25287e-21	-	Reeler		55.4357	57.522	69.1427	19.0466	20.1391	19.0954	45.0526	45.5536	37.552	10.065	7.82353	9.42265
BOKJ_0885900.1	sy867Hm	WtHm	-2.39798	0.940457	9.58234e-06	8.26016e-05				1.01395	1.36853	0	0	0	0	5.3742	5.73067	2.58155	2.82258	1.27979	2.44654
BOKJ_0696200.1	sy867Hm	WtHm	-2.4052	3.6936	7.01423e-11	1.98909e-09				301.379	153.597	153.819	96.4453	218.82	226.095	192.624	245.779	175.025	19.2471	29.4085	42.4636
BOKJ_0939800.1	sy867Hm	WtHm	-2.40538	4.51318	2.19666e-08	3.68492e-07	Belongs to the ATP guanido phosphotransferase family	ATP-gua_Ptrans,ATP-gua_PtransN	Masculine	68.9106	19.2747	18.106	926.739	926.986	913.178	1473.78	1170.18	1544.75	6.23243	6.35198	6.52486
BOKJ_1094300.1	sy867Hm	WtHm	-2.40767	4.52024	2.54166e-18	2.24934e-16	-	-		49.0799	69.3132	108.305	61.0922	79.0733	44.6874	50.7304	49.6386	55.1691	11.4806	13.2936	14.1573
BOKJ_0425400.1	sy867Hm	WtHm	-2.41858	5.77487	4.44145e-32	1.34312e-29	Belongs to the UDP-glycosyltransferase family	UDPGT		69.5171	107.55	110.337	48.6445	31.0539	21.8666	101.907	73.7997	85.0007	16.9134	14.6006	14.8584
BOKJ_1123900.1	sy867Hm	WtHm	-2.4217	-0.252149	4.49227e-05	0.000312393	Helix-turn-helix domain	PAX		1.56557	0.935991	3.04822	0.776019	0	3.70863	1.31603	0.353038	0.742728	0.240706	0.157169	0.533519
BOKJ_0769900.1	sy867Hm	WtHm	-2.42743	3.14186	2.66491e-07	3.40773e-06				35.0485	10.5668	8.835	610.555	552.54	613.251	651.41	555.564	678.628	2.40824	2.44548	2.8483
BOKJ_0553900.1	sy867Hm	WtHm	-2.42895	5.68518	8.03636e-07	9.10109e-06	-	-		50.7295	145.442	146.894	72.4611	231.61	64.7201	95.0147	92.7688	77.5777	5.40861	29.8576	22.758
BOKJ_0748100.1	sy867Hm	WtHm	-2.43439	5.49675	9.30814e-11	2.58434e-09		MFP2b	Masculine	158.014	52.0088	51.7464	2490.39	2199.29	2273.3	3143.35	2765.74	3343.15	14.8867	14.1644	15.1644
BOKJ_0629100.1	sy867Hm	WtHm	-2.44034	-0.608268	0.000882472	0.00393072				1.06438	0.0521639	1.50552	0.0579405	1.03453	0.790441	0.453661	0.283696	0.564165	0.0665831	0.151333	0.162678
BOKJ_0943700.1	sy867Hm	WtHm	-2.44296	0.328853	4.18864e-05	0.000294945	-	-		1.3308	6.31585	7.69944	4.46608	1.80175	2.77512	10.1767	5.50809	4.52848	0.44906	0.509879	0.611769
BOKJ_0911700.1	sy867Hm	WtHm	-2.44297	0.178202	3.35301e-05	0.000241888				21.04	11.7379	10.0074	90.5103	108.58	117.616	2.32939	5.40444	2.90372	3.29003	0.194547	3.50022
BOKJ_0544900.1	sy867Hm	WtHm	-2.44654	4.90099	2.11506e-13	9.3539e-12				106.216	37.8754	101.9	6.88982	0	5.42709	672.85	499.005	503.157	34.8468	23.9162	21.9853
BOKJ_1288200.1	sy867Hm	WtHm	-2.44989	1.10407	6.14622e-06	5.57746e-05				24.7481	6.9555	6.3136	230.618	251.873	295.008	743.13	653.332	709.237	3.27449	1.36073	3.0822
BOKJ_0867800.1	sy867Hm	WtHm	-2.45456	2.44181	1.76739e-10	4.62039e-09	L-lysine 6-monooxygenase (NADPH-requiring)	FMO-like		4.82851	10.1389	5.12251	1.91515	3.36295	2.68158	9.77002	7.1192	9.50165	1.06436	0.879489	1.43466
BOKJ_1268600.1	sy867Hm	WtHm	-2.45703	2.45062	1.79104e-06	1.85383e-05	transmembrane transport	MFS_1		4.21231	24.0315	12.7158	7.01139	16.9195	13.2498	7.54775	6.99843	6.88736	1.86548	1.24708	2.64674
BOKJ_0967600.1	sy867Hm	WtHm	-2.4572	1.72657	2.59749e-06	2.59726e-05	Protein phosphatase 2A homologues, catalytic domain.	Metallophos	Masculine	15.8846	4.72675	4.97244	244.052	250.966	258.316	334.864	301.081	351.982	1.40385	0.825799	1.76886
BOKJ_0331600.1	sy867Hm	WtHm	-2.45727	2.633	1.92106e-07	2.57422e-06	Belongs to the AAA ATPase family	AAA	Masculine	17.3166	6.39291	5.19137	272.825	272.882	250.381	362.201	317.8	377.527	1.99623	1.28085	1.41596
BOKJ_0384500.1	sy867Hm	WtHm	-2.45952	1.15384	3.63662e-07	4.4813e-06	N-acylneuraminate-9-phosphatase activity	HAD_2		9.15011	6.28133	10.689	11.0844	10.7344	14.7859	5.52044	4.78029	4.19671	1.19704	1.17295	2.47546
BOKJ_0592900.1	sy867Hm	WtHm	-2.45976	5.14074	4.84687e-09	9.49765e-08	Belongs to the protein kinase superfamily	Pkinase	Masculine	128.156	38.9926	31.6286	1656.42	1418.58	1471	2496.22	2153.19	2675.24	14.046	12.8123	13.759
BOKJ_1297200.1	sy867Hm	WtHm	-2.46444	1.01571	1.72973e-07	2.34309e-06				3.21006	4.40298	8.73391	0	0.150306	0	3.73189	4.77182	11.3052	0.566813	0.5382	1.23273
BOKJ_1027000.1	sy867Hm	WtHm	-2.48035	2.12141	5.9776e-11	1.75087e-09				79.3468	34.85	60.3945	25.0889	57.0757	23.1668	24.6064	32.8017	23.8176	8.28957	8.26939	5.64383
BOKJ_0813500.1	sy867Hm	WtHm	-2.4806	6.28928	2.29006e-24	3.60894e-22	Mycolic acid cyclopropane synthetase	Methyltransf_11		240.091	139.393	175.491	236.207	241.717	146.705	67.0983	70.0903	53.7683	34.8979	21.326	24.9941
BOKJ_0096400.1	sy867Hm	WtHm	-2.48272	6.75012	5.78871e-16	3.65931e-14	Formate--tetrahydrofolate ligase	FTHFS		68.8304	219.536	106.858	45.2468	66.4864	58.4313	65.6769	48.1128	66.5565	22.157	18.6913	19.6742
BOKJ_0368200.1	sy867Hm	WtHm	-2.48874	5.24433	2.97793e-10	7.40445e-09		DUF236	Masculine	112.624	31.2862	29.3721	1088.83	927.639	970.423	1681.67	1485.85	1764.44	14.2059	12.3549	11.8757
BOKJ_0179000.1	sy867Hm	WtHm	-2.49273	6.8372	1.84084e-08	3.15424e-07		ShK		174.716	111.387	131.999	110.598	116.922	99.2007	13.3035	43.6718	18.6331	26.3605	5.13786	31.6113
BOKJ_0303700.1	sy867Hm	WtHm	-2.49348	5.90935	7.30005e-10	1.71237e-08	Central component in molecular interactions underlying sperm crawling. Forms an extensive filament system that extends from sperm villipoda, along the leading edge of the pseudopod	Motile_Sperm	Masculine	1261.59	430.394	340.797	19471.8	18799	20323.2	26529.4	22444	28174.7	110.18	82.3018	105.057
BOKJ_0392900.1	sy867Hm	WtHm	-2.49625	1.96197	9.86346e-13	4.01317e-11				13.0282	11.5715	22.3777	75.7407	50.852	72.846	4.52626	3.27266	1.56438	5.98073	6.64096	5.1204
BOKJ_0117700.1	sy867Hm	WtHm	-2.50241	0.353159	8.36653e-06	7.37692e-05				0.777158	3.42293	3.11753	4.30747	4.44967	1.39517	0.509657	0.276603	0.600867	0.0565354	0.475855	0.390802
BOKJ_0356300.1	sy867Hm	WtHm	-2.50794	5.2775	1.66002e-20	1.8574e-18	aspartic-type endopeptidase activity	Asp	Feminine	77.9677	52.0203	83.6343	17.6489	27.3684	6.78102	64.4977	61.1209	47.9922	13.601	11.6447	7.65711
BOKJ_0310100.1	sy867Hm	WtHm	-2.50842	8.46512	8.49347e-28	1.75988e-25	alcohol dehydrogenase (NAD) activity	ADH_N,ADH_zinc_N	Masculine	366.979	638.492	838.926	1305.45	5773.77	3113.42	966.318	840.99	980.493	90.1969	83.9498	88.7571
BOKJ_0433800.1	sy867Hm	WtHm	-2.51767	0.691418	1.22535e-08	2.18319e-07				11.2125	10.8715	12.3478	503.017	383.161	370.293	598.87	491.227	593.388	3.08058	1.86353	1.80469
BOKJ_0206600.1	sy867Hm	WtHm	-2.51948	5.09558	2.45903e-10	6.21086e-09		ZYG-11_interact	Masculine	176.5	55.5004	48.757	2507.9	2474.21	2586.03	4807.24	4056.53	5001.5	18.4887	15.5825	19.4755
BOKJ_1300500.1	sy867Hm	WtHm	-2.52559	7.10872	3.26673e-54	3.04595e-51	Domain in homologues of a S. cerevisiae phosphatidylinositol transfer protein (Sec14p)	CRAL_TRIO		239.252	302.25	238.057	83.2403	89.0177	124.513	138.463	134.591	133.192	38.2043	33.0801	38.1934
BOKJ_0090600.1	sy867Hm	WtHm	-2.52619	-0.540235	1.16828e-06	1.26176e-05	C2H2-type zinc finger	zf-C2H2,zf-C2H2_6		1.19808	0.530695	0.756671	0.123569	1.41989	0	0.466474	0.291613	0.407349	0.085117	0.154255	0.129768
BOKJ_0937100.1	sy867Hm	WtHm	-2.5283	2.72163	1.75332e-08	3.03386e-07	Domain present in PSD-95, Dlg, and ZO-1/2.	-	Masculine	37.6322	15.6686	11.8293	798.597	685.491	680.957	857.001	737.622	901.552	3.90501	3.38171	4.11854
BOKJ_0434600.1	sy867Hm	WtHm	-2.5285	1.57683	4.43005e-05	0.000308834				0.885784	10.5313	10.7071	0	0	0	6.6547	4.53137	3.95702	2.52006	2.0579	4.58018
BOKJ_0451400.1	sy867Hm	WtHm	-2.53364	4.9924	6.3146e-24	9.29658e-22	homogentisate 1,2-dioxygenase	HgmA		43.497	75.4379	65.6572	13.4638	18.4014	17.7999	138.105	111.185	110.575	9.91465	7.83293	11.0766
BOKJ_0971500.1	sy867Hm	WtHm	-2.53853	1.82789	5.40234e-06	4.97095e-05	RNase H	RNase_H	Masculine	5.04284	1.12049	1.23423	100.656	105.94	109.54	139.459	127.183	150.63	0.243666	0.380182	0.454669
BOKJ_0045800.1	sy867Hm	WtHm	-2.55156	6.06697	8.08961e-42	4.52573e-39	amino acid transport	Aa_trans		127.852	139.408	147.276	108.077	77.1153	158.108	30.3593	35.2014	32.3073	19.9036	16.0642	23.6608
BOKJ_0812200.1	sy867Hm	WtHm	-2.56184	1.52192	7.98851e-08	1.18389e-06				9.83573	4.43675	3.91505	31.2277	23.1191	16.7137	7.05248	4.56185	3.59159	1.31032	1.06282	1.52836
BOKJ_1333500.1	sy867Hm	WtHm	-2.56275	9.03243	2.77822e-06	2.7607e-05	structural constituent of cuticle	-	Feminine	1484.44	195.125	321.895	43.4122	296.418	191.379	361.356	435.97	343.766	127.1	95.2308	122.694
BOKJ_0180200.1	sy867Hm	WtHm	-2.57216	6.02148	5.44893e-09	1.05299e-07		ShK		256.536	234.735	261.711	359.476	689.873	438.646	33.1693	112.872	39.8352	48.0548	7.63642	47.498
BOKJ_0823000.1	sy867Hm	WtHm	-2.57369	2.63441	1.09386e-07	1.55969e-06		Col_cuticle_N,Collagen	Feminine	9.1245	1.87364	10.4275	0	0	0.0786016	0.480797	0.603653	0.636085	1.51678	1.02391	1.03956
BOKJ_0044500.1	sy867Hm	WtHm	-2.58802	8.413	3.97199e-21	4.72794e-19	-	-		1752.79	5307.92	4117.07	3952.29	2023.56	1962.82	1792.76	1428.11	1501.02	471.284	423.966	390.829
BOKJ_1331400.1	sy867Hm	WtHm	-2.59139	-0.328686	0.000280372	0.00150315				0.57885	0	1.38557	74.2532	86.3199	89.4636	204.611	165.762	194.239	0.196938	0.280276	0.807788
BOKJ_0702300.1	sy867Hm	WtHm	-2.59401	2.04859	9.15492e-08	1.33378e-06	belongs to the flavoprotein pyridine nucleotide cytochrome reductase family	FAD_binding_1,Flavodoxin_1,NAD_binding_1		4.16542	28.9722	2.87492	3.3046	7.11317	1.06713	0.239857	0.248386	4.15337	1.6187	1.26347	1.20914
BOKJ_1179500.1	sy867Hm	WtHm	-2.59803	2.91242	7.29589e-07	8.36411e-06	FFAT motif binding	Motile_Sperm	Masculine	8.72379	1.89261	2.43858	120.522	118.081	120.333	210.935	189.739	226.588	0.590772	0.587095	0.90704
BOKJ_1180600.1	sy867Hm	WtHm	-2.59958	3.08933	1.64211e-15	9.72148e-14	MafB19-like deaminase	dCMP_cyt_deam_1		46.0205	55.771	35.9231	72.1947	3.45138	17.4029	71.9224	64.7074	53.106	8.0598	5.72915	8.81646
BOKJ_0942100.1	sy867Hm	WtHm	-2.60383	3.11881	4.53689e-10	1.11079e-08				35.9364	14.172	13.2272	715.471	734.35	692.86	1074.48	924.181	1115.52	3.49402	3.41565	4.03904
BOKJ_0021400.1	sy867Hm	WtHm	-2.60914	3.55298	5.54048e-05	0.00037435	structural constituent of cuticle	Col_cuticle_N,Collagen	Feminine	40.6869	2.5732	12.8572	2.43327	2.1434	3.13345	1.93182	2.05384	3.25944	3.43262	2.5145	2.57223
BOKJ_0298100.1	sy867Hm	WtHm	-2.61546	0.349162	2.44118e-05	0.000187085	positive regulation of vulval development	Pkinase_Tyr		5.93309	8.52077	0.477605	0.0730632	1.79881	1.15677	0.130718	0.10542	0.050472	0.271715	0.427748	0.31926
BOKJ_0440400.1	sy867Hm	WtHm	-2.62251	0.112679	6.12683e-06	5.56437e-05	Nematode cuticle collagen N-terminal domain	Col_cuticle_N,Collagen		1.35379	0.779633	4.01435	0.222246	0	1.28882	0.969695	0.330959	0.702433	0.406191	0.166647	0.420797
BOKJ_1163000.1	sy867Hm	WtHm	-2.62678	3.62103	1.08823e-07	1.55506e-06	Elongation of very long chain fatty acids protein	ELO		16.769	92.6601	40.0963	72.4778	134.298	134.862	285.047	210.546	265.758	4.69647	7.51459	9.03648
BOKJ_0866300.1	sy867Hm	WtHm	-2.62687	-0.426073	0.000170546	0.00097708		Col_cuticle_N,Collagen		2.30443	0.205784	2.96165	0	0	2.39845	3.83567	0.343254	1.44438	0.232111	0.26619	0.259118
BOKJ_0612400.1	sy867Hm	WtHm	-2.62895	4.45537	4.41786e-11	1.33238e-09	serine threonine-protein phosphatase	Metallophos,STPPase_N	Masculine	71.19	22.771	22.9133	688.624	686.348	781.55	1656.34	1516.57	1802.12	8.05711	7.06928	7.37977
BOKJ_1275300.1	sy867Hm	WtHm	-2.62913	6.22886	7.89681e-18	6.31124e-16		MFS_1		50.6054	127.169	76.6923	35.3587	17.8605	20.2961	44.7251	40.2034	42.2757	13.6037	9.3674	18.1762
BOKJ_0107500.1	sy867Hm	WtHm	-2.62999	0.359147	1.50384e-06	1.57551e-05				0	9.97358	0	0	0	0	35.9286	56.9679	25.8887	5.02445	2.84812	10.8272
BOKJ_0564600.1	sy867Hm	WtHm	-2.63948	5.37569	4.44064e-10	1.08961e-08	FFAT motif binding	Motile_Sperm	Masculine	50.4961	14.9843	12.7661	516.472	525.208	540.236	923.613	812.196	986.214	3.71932	3.57477	4.61193
BOKJ_0592600.1	sy867Hm	WtHm	-2.64447	3.81929	2.95817e-08	4.8109e-07				90.1604	22.5736	20.2767	973.125	963.175	926.854	1613.53	1417	1727.09	8.85624	5.77895	6.82937
BOKJ_0788800.1	sy867Hm	WtHm	-2.6487	6.59825	1.80637e-16	1.19449e-14	glycerophosphodiester phosphodiesterase activity	GDPD		76.2175	227.427	197.536	63.995	64.7999	63.6129	127.719	104.665	120.751	29.5623	29.5674	29.7305
BOKJ_0037000.1	sy867Hm	WtHm	-2.64898	4.68318	1.4586e-11	4.74426e-10	Central component in molecular interactions underlying sperm crawling. Forms an extensive filament system that extends from sperm villipoda, along the leading edge of the pseudopod	Motile_Sperm	Masculine	75.692	27.4602	22.7948	1351.96	1347.53	1199.42	1420.55	1201.59	1461.73	6.64825	5.46004	5.72101
BOKJ_0745700.1	sy867Hm	WtHm	-2.64953	6.66126	1.06374e-37	4.76086e-35				90.1248	83.9328	111.848	88.7551	102.203	117.428	72.817	67.4577	83.4693	9.77225	15.1536	13.9759
BOKJ_0162900.1	sy867Hm	WtHm	-2.65148	2.02494	1.01846e-09	2.32562e-08				13.2471	4.89189	7.83055	351.609	306.206	322.937	360.986	303.514	378.329	1.07005	1.14821	1.64789
BOKJ_0998600.1	sy867Hm	WtHm	-2.65195	2.26757	1.18466e-08	2.12082e-07				19.3876	6.66162	11.4573	784.018	535.183	674.266	1466.51	1221.04	1687.21	2.07078	4.05854	4.61726
BOKJ_1037000.1	sy867Hm	WtHm	-2.65219	1.53154	3.16301e-07	3.98098e-06	-	-	Feminine	25.0845	10.1723	51.8646	5.08435	1.54589	0.988032	36.822	20.6403	23.8216	3.15094	1.97458	4.03308
BOKJ_0514300.1	sy867Hm	WtHm	-2.65566	7.56778	2.60239e-13	1.14638e-11	regulation of muscle system process	-		426.06	116.113	171.415	50.6975	69.9473	93.8143	89.7654	93.1673	89.4804	33.492	34.7616	35.8722
BOKJ_0802800.1	sy867Hm	WtHm	-2.65675	0.276312	1.07347e-08	1.95047e-07	Histone H3	Histone		12.6456	7.43747	13.6385	0	0	5.06049	4.17047	11.4724	5.4535	2.02185	1.9252	1.00347
BOKJ_0682200.1	sy867Hm	WtHm	-2.65677	2.16534	0.000100759	0.000624941	Zona pellucida (ZP) domain	VWA,Zona_pellucida		5.05569	0.640462	11.1171	1.9038	2.28381	1.00081	5.47797	0.759051	3.4315	0.85241	0.505587	0.803055
BOKJ_0260500.1	sy867Hm	WtHm	-2.66546	0.172747	1.40063e-08	2.4641e-07	Leucine-rich repeats, typical (most populated) subfamily	LRR_8	Feminine	1.93946	1.05702	1.70692	0.439461	0	0.396562	0.377586	0.42623	0.448691	0.188352	0.134788	0.202722
BOKJ_0169400.1	sy867Hm	WtHm	-2.66863	5.07556	9.8184e-19	9.31001e-17	Eukaryotic protein of unknown function (DUF829)	DUF829		47.7894	70.3036	98.2985	199.168	282.481	273.187	271.245	245.207	272.084	16.4903	14.4201	16.6051
BOKJ_1275500.1	sy867Hm	WtHm	-2.68271	3.3036	2.86423e-08	4.66489e-07				564.971	165.471	211.109	5827.38	4861.91	5592.6	9927.27	9543.9	9339.04	65.9883	36.9455	50.6333
BOKJ_1376000.1	sy867Hm	WtHm	-2.68363	1.41588	1.26713e-06	1.35674e-05	BPI/LBP/CETP C-terminal domain	LBP_BPI_CETP_C		2.32384	0.953512	6.27842	2.14097	0.796041	2.25843	1.64992	1.30454	1.24344	0.524658	0.442611	0.603475
BOKJ_0736700.1	sy867Hm	WtHm	-2.6882	9.22199	2.1225e-06	2.16093e-05		Col_cuticle_N,Collagen	Feminine	2063.1	213.043	608.352	64.6438	447.014	360.643	511.842	556.681	477.787	192.068	110.421	148.826
BOKJ_0312800.1	sy867Hm	WtHm	-2.6884	2.09642	4.41966e-09	8.76801e-08	-	-	Feminine	14.7892	7.22512	24.0901	2.36729	4.68309	0.772576	9.43964	2.95189	5.31253	1.70936	2.277	1.53068
BOKJ_1210200.1	sy867Hm	WtHm	-2.69115	2.75185	1.34861e-08	2.37631e-07				15.7351	77.34	110.243	36.5241	16.8576	20.1493	40.9266	31.2125	39.4374	16.3868	13.4316	18.787
BOKJ_0259000.1	sy867Hm	WtHm	-2.69355	4.18709	1.45885e-08	2.55049e-07	glutamine biosynthetic process	Gln-synt_C,Gln-synt_N	Masculine	65.4187	17.9681	15.3633	689.729	714.062	692.45	855.708	788.754	926.494	5.24115	4.1998	4.67856
BOKJ_0424800.1	sy867Hm	WtHm	-2.69384	-0.180124	1.68558e-05	0.000134714	DB module	DB		1.41747	0.298563	0.741294	0	1.7474	0.158599	0.323388	0.622844	0.361398	0.142794	0.0650908	0.172151
BOKJ_0280000.1	sy867Hm	WtHm	-2.69615	5.35299	6.67779e-28	1.40977e-25	Belongs to the heat shock protein 70 family	HSP70		44.8026	34.1453	58.0738	24.676	45.7729	43.1176	123.272	74.7661	133.626	4.7814	7.23419	6.34313
BOKJ_1406000.1	sy867Hm	WtHm	-2.70132	7.0983	3.77396e-30	1.0054e-27	Aldo/keto reductase family	Aldo_ket_red	Masculine	276.428	336.999	197.464	2038.41	1222.16	1358.98	72.672	130.797	66.6498	46.8911	33.3232	27.4754
BOKJ_0765400.1	sy867Hm	WtHm	-2.70307	2.20253	1.3935e-06	1.47372e-05	LBP / BPI / CETP family, N-terminal domain	LBP_BPI_CETP,LBP_BPI_CETP_C	Feminine	7.33419	0.825889	6.00346	0.150532	2.18286	0.158713	0.517924	0.433118	0.481146	0.512383	0.775696	0.653102
BOKJ_0848500.1	sy867Hm	WtHm	-2.71139	0.515248	6.68468e-05	0.000439453	Zinc-dependent metalloprotease	Astacin,ShK		1.73159	0.222033	5.11771	0.693806	0	1.82968	2.89388	0.721113	1.79503	0.489324	0.278169	0.161084
BOKJ_0652800.1	sy867Hm	WtHm	-2.72898	8.87604	2.29772e-18	2.05674e-16	Belongs to the glycosyl hydrolase 31 family	Gal_mutarotas_2,Glyco_hydro_31,NtCtMGAM_N,Trefoil	Feminine	215.438	623.573	358.445	13.5828	133.456	148.343	233.589	186.564	229.921	34.9241	52.9509	59.0984
BOKJ_1219800.1	sy867Hm	WtHm	-2.7297	3.14884	2.32084e-09	4.84475e-08	Protein kinase domain	-	Masculine	34.9541	9.22478	13.1091	451.395	454.904	555.881	708.256	654.512	749.787	3.48675	2.68117	2.74683
BOKJ_1117000.1	sy867Hm	WtHm	-2.73528	3.92886	3.03747e-09	6.20188e-08				36.7723	10.7577	8.65664	480.663	463.409	474.058	677.836	604.803	750.767	2.6607	2.41697	2.87337
BOKJ_0180000.1	sy867Hm	WtHm	-2.74083	-0.651608	3.33999e-07	4.18022e-06	EB module	EB		1.10679	1.02315	0.458005	1.27191	0.990189	0	0.908626	0.731417	0.831575	0.0833421	0.126816	0.245213
BOKJ_1093800.1	sy867Hm	WtHm	-2.75345	0.0767159	2.55882e-05	0.00019437	Thrombospondin type 1 repeats	-		3.34872	1.11663	10.7957	2.73785	0	5.20672	5.40638	0.39067	4.6534	0.790987	0.628298	0.690198
BOKJ_1478200.1	sy867Hm	WtHm	-2.76294	-0.298028	1.75432e-08	3.03386e-07				5.051	4.42482	4.27127	7.97794	10.881	6.09023	0.587837	0.355899	0.488875	0.474377	0.47299	0.455485
BOKJ_0379000.1	sy867Hm	WtHm	-2.76874	4.78698	3.1078e-11	9.5269e-10				53.3575	16.161	60.8188	32.2373	72.4893	72.8949	50.9119	46.0113	42.3294	7.12229	4.27067	4.29865
BOKJ_1199200.1	sy867Hm	WtHm	-2.77361	9.4879	4.00567e-14	1.97763e-12	Belongs to the histidine acid phosphatase family	His_Phos_2		434.628	1578.66	1771.75	610.99	933.397	837.443	284.244	269.08	253.832	184.799	196.161	195.328
BOKJ_0179200.1	sy867Hm	WtHm	-2.77577	2.41726	3.74297e-07	4.59211e-06	phosphotransferase activity, alcohol group as acceptor	Pkinase	Masculine	15.9271	4.32717	3.24322	206.122	186.316	208.182	310.005	264.215	327.475	0.687934	1.02562	1.16138
BOKJ_0588200.1	sy867Hm	WtHm	-2.78769	1.14686	3.91517e-05	0.000277786				9.8802	1.50216	8.39706	621.308	542.495	564.982	571.171	478.107	584.873	0.399906	0.512925	2.00123
BOKJ_1202900.1	sy867Hm	WtHm	-2.79051	4.59152	2.33464e-27	4.58286e-25	Choline/ethanolamine kinase	Choline_kinase		46.9352	46.2747	64.252	42.5748	46.6494	62.2614	16.6052	12.3145	14.5055	7.635	5.33853	7.07485
BOKJ_0087800.1	sy867Hm	WtHm	-2.79286	5.29658	4.08644e-08	6.51328e-07	Central component in molecular interactions underlying sperm crawling. Forms an extensive filament system that extends from sperm villipoda, along the leading edge of the pseudopod	Motile_Sperm	Masculine	838.493	196.557	288.014	13782.6	13872.9	15898.7	15598.2	13216.1	17251.9	58.7125	34.3127	88.0652
BOKJ_1369000.1	sy867Hm	WtHm	-2.79758	-0.164464	6.93875e-08	1.04492e-06	catalytic activity	AMP-binding,AMP-binding_C	Feminine	0.831647	2.58255	1.64723	0	0	0.335789	1.42627	0.950812	1.21935	0.223684	0.101338	0.121067
BOKJ_1330200.1	sy867Hm	WtHm	-2.8004	7.44033	1.16909e-69	2.18016e-66	hydrolase activity	HAD_2		306.445	348.415	351.059	195.688	171.762	230.474	89.9669	86.7863	93.0686	55.2725	57.7844	56.4355
BOKJ_1013300.1	sy867Hm	WtHm	-2.80272	3.2484	5.57832e-19	5.42746e-17				68.438	91.0269	42.2641	75.134	268.585	146.341	95.6953	99.952	92.1119	15.0218	19.3988	22.8334
BOKJ_0531700.1	sy867Hm	WtHm	-2.81057	7.99882	1.60434e-24	2.63984e-22				1563.22	4618.88	3962.05	1022.68	704.699	470.323	505.893	343.419	479.093	394.056	352.661	417.458
BOKJ_0805600.1	sy867Hm	WtHm	-2.81221	4.03741	1.18953e-12	4.78765e-11				45.7558	14.0434	18.0489	899.88	889.741	839.294	1042.38	909.254	1104.52	3.06325	3.76876	3.2921
BOKJ_1362100.1	sy867Hm	WtHm	-2.81854	4.1301	4.77058e-10	1.16039e-08				329.604	98.7767	109.123	4494.91	4488.49	4367.87	2983.8	2595.26	3295.21	27.5452	14.9831	15.4134
BOKJ_1367800.1	sy867Hm	WtHm	-2.82347	-0.0328537	9.3577e-08	1.35802e-06	Voltage gated chloride channel	Voltage_CLC		0.693485	1.03443	1.59487	1.28401	2.66417	0.604989	0.476193	0.591599	0.693619	0.0961391	0.0932815	0.162857
BOKJ_1450800.1	sy867Hm	WtHm	-2.82772	1.22386	3.65235e-08	5.89698e-07				20.6691	5.99442	7.22157	541.886	390.913	481.272	672.914	555.173	723.908	1.31283	1.20797	1.95604
BOKJ_0893700.1	sy867Hm	WtHm	-2.83253	3.19243	2.14983e-09	4.51303e-08				106.387	32.1048	26.0612	1838.17	1786.72	1896.36	1641.03	1504.66	1792.6	5.46559	5.53589	7.04955
BOKJ_1285100.1	sy867Hm	WtHm	-2.83341	1.38563	1.15308e-08	2.07425e-07				5.73802	18.4429	17.1591	0	0	0	0.561555	0.454958	0.271428	0.467941	1.05721	22.727
BOKJ_0631800.1	sy867Hm	WtHm	-2.85879	1.19605	1.38954e-06	1.4723e-05	lipid transport	-		11.0021	1.27314	4.31007	0	2.25397	1.07093	0.698437	0.811611	1.54771	0.590207	0.315053	0.341654
BOKJ_0080400.1	sy867Hm	WtHm	-2.85983	2.12077	1.59314e-05	0.000128242	Collagen triple helix repeat (20 copies)	Col_cuticle_N,Collagen	Feminine	6.23072	0.73817	16.6006	0	0.950107	0.691334	6.50128	0.794981	5.28301	0.774074	0.911157	0.880334
BOKJ_0225400.1	sy867Hm	WtHm	-2.86854	6.01834	2.94138e-26	5.39526e-24	Phosphomannose isomerase type I	PMI_typeI		140.466	60.5538	107.712	24.7915	37.2364	27.1689	33.6012	27.3643	24.3645	10.9196	10.9653	14.1017
BOKJ_0996800.1	sy867Hm	WtHm	-2.86902	6.20978	5.13619e-12	1.83022e-10	Central component in molecular interactions underlying sperm crawling. Forms an extensive filament system that extends from sperm villipoda, along the leading edge of the pseudopod	Motile_Sperm	Masculine	1755.31	598.9	526.276	19916.1	19787.4	21000.3	20790.9	18047.4	21474.5	126.203	74.8701	99.6707
BOKJ_0694800.1	sy867Hm	WtHm	-2.87509	0.299274	6.72082e-08	1.01758e-06	Extracellular domain of unknown function in nidogen (entactin) and hypothetical proteins.	EGF_3,NIDO		1.1564	0.266392	0.939525	0.0967684	0.573913	0.813132	0.609109	0.536965	0.405737	0.0815012	0.0621727	0.0601555
BOKJ_0517400.1	sy867Hm	WtHm	-2.88714	3.38306	2.8671e-19	2.89009e-17	Major Facilitator Superfamily	MFS_1		13.0121	7.71001	8.40248	9.07467	6.2003	12.344	1.42488	2.46687	2.38823	1.11456	1.17092	1.00549
BOKJ_1365600.1	sy867Hm	WtHm	-2.89166	0.505145	1.19155e-05	9.98667e-05	-	-		5.82795	0.872299	5.18158	2.53315	0	0	0.435859	0.791944	0.631098	0.219832	0.399136	0.621968
BOKJ_0211900.1	sy867Hm	WtHm	-2.89554	5.34934	2.0227e-11	6.50344e-10	male meiosis chromosome segregation	-	Masculine	160.05	38.2957	41.4101	1480.92	1605.08	1626.31	3808.52	3174.39	4105.9	13.995	11.9961	14.783
BOKJ_0405300.1	sy867Hm	WtHm	-2.90472	4.85379	1.5076e-26	2.85908e-24				278.12	403.638	735.377	733.668	439.44	444.743	438.893	913.241	482.557	125.146	134.949	167.625
BOKJ_1179600.1	sy867Hm	WtHm	-2.91453	3.2402	1.9943e-08	3.40155e-07	FFAT motif binding	Motile_Sperm	Masculine	18.0773	5.46597	3.68744	278.391	257.637	253.109	308.393	265.934	324.217	0.805139	1.50056	1.24209
BOKJ_1204100.1	sy867Hm	WtHm	-2.94306	-0.292725	2.25808e-07	2.93786e-06	SAM / Pointed domain	Ets,SAM_PNT		0.839037	0.719419	2.40922	1.15347	1.28147	2.26125	0.820486	0.817378	0.456248	0.112106	0.102848	0.174187
BOKJ_0299300.1	sy867Hm	WtHm	-2.95841	1.59709	6.66856e-10	1.57747e-08				7.27756	4.3015	0	347.71	280.486	189.787	907.967	814.784	977.231	3.25679	3.6995	5.17643
BOKJ_0541400.1	sy867Hm	WtHm	-2.9597	4.39233	1.69727e-16	1.1304e-14				101.823	30.4341	44.0621	1988.1	1981.98	1862.13	3876.22	3554.29	4273.57	27.0849	15.116	18.6787
BOKJ_1267100.1	sy867Hm	WtHm	-2.97077	6.69906	1.28523e-28	2.81969e-26				176.889	352.105	366.744	44.5602	34.0721	29.1205	284.351	333.021	248.563	40.1583	30.7943	28.3204
BOKJ_0400200.1	sy867Hm	WtHm	-2.97304	2.21488	0.000181727	0.00103425				15.5813	1.4213	131.767	0	0	0	17.6661	3.33966	9.42581	6.44871	4.30024	4.33027
BOKJ_0338400.1	sy867Hm	WtHm	-2.98304	4.96196	3.34338e-11	1.01655e-09				69.0579	18.3773	16.6668	579.713	560.793	584.04	1129.54	1051.19	1218.97	4.55159	3.71998	5.03422
BOKJ_0380300.1	sy867Hm	WtHm	-2.98871	0.256502	1.3373e-08	2.36382e-07	-	-		1.33772	1.0385	2.49701	0	1.50302	1.13374	0.424418	0.77534	0.510539	0.182287	0.127298	0.341994
BOKJ_0151100.1	sy867Hm	WtHm	-3.00134	2.92729	1.139e-06	1.2361e-05	structural constituent of cuticle	-	Feminine	7.09853	2.05443	27.1811	2.42297	1.75874	0.485117	18.7275	1.97979	8.03942	1.43917	1.13912	1.46499
BOKJ_1445400.1	sy867Hm	WtHm	-3.00818	4.40324	2.16905e-36	8.36881e-34	c4 zinc finger in nuclear hormone receptors	Hormone_recep,zf-C4		38.5149	40.9815	37.567	55.8243	60.8952	56.3787	9.07705	8.36319	7.19041	3.79269	4.72774	4.75535
BOKJ_1461800.1	sy867Hm	WtHm	-3.02819	1.26634	2.58426e-14	1.3449e-12	Aspartate aminotransferase	Aminotran_1_2		4.08541	5.1866	5.78902	11.9589	18.4661	16.5003	1.01673	0.693002	1.50017	0.563248	0.674084	0.610952
BOKJ_0680500.1	sy867Hm	WtHm	-3.02946	1.10636	7.98017e-09	1.47343e-07	-	-		6.01177	2.54643	6.32248	5.93191	0.164744	1.80049	0.232299	0.622854	0.295279	0.0405831	0.32452	0.537815
BOKJ_0928400.1	sy867Hm	WtHm	-3.03048	-0.673243	3.82562e-08	6.13226e-07	catalytic activity	AMP-binding,AMP-binding_C		0.771796	0.883168	0.765159	0.975608	5.45487	1.05261	2.62278	4.3821	2.69996	0.0541194	0.36314	0.115007
BOKJ_0776200.1	sy867Hm	WtHm	-3.0479	5.50607	6.95508e-11	1.98016e-09				96.906	27.3541	18.8214	868.119	940.085	942.858	1729.15	1542.06	1802.87	6.18273	6.65736	6.0575
BOKJ_0112500.1	sy867Hm	WtHm	-3.05107	1.38734	0.000608674	0.00287969	Ground-like domain	Ground-like	Feminine	30.2586	0.766138	2.98108	0	0	0	1.04638	1.16537	1.27535	0.923189	0.638949	1.87108
BOKJ_0436300.1	sy867Hm	WtHm	-3.06495	6.08954	9.24926e-16	5.65519e-14				123.929	418.526	430.134	95.4859	34.4792	68.9985	569.498	720.124	499.208	217.792	89.6702	166.176
BOKJ_0657400.1	sy867Hm	WtHm	-3.07743	-0.126825	2.42157e-07	3.13962e-06	Aminopeptidase P, N-terminal domain	AMP_N,Peptidase_M24		1.37053	0.745395	3.4847	3.48437	1.14541	1.52223	0.620664	0.448714	0.202237	0.227089	0.0639499	0.243266
BOKJ_0423800.1	sy867Hm	WtHm	-3.08752	-0.222769	2.82961e-08	4.62873e-07	Nematode cuticle collagen N-terminal domain	Col_cuticle_N		2.41252	0.827995	1.38509	0	0	0	0.30313	0.17119	0.143425	0.142125	0.190313	0.184823
BOKJ_0782900.1	sy867Hm	WtHm	-3.09507	5.88407	4.89085e-14	2.34866e-12				41.8106	161.848	154.98	16.6803	13.0595	26.1796	44.1489	63.3663	61.8757	15.1077	10.1489	14.0768
BOKJ_0118300.1	sy867Hm	WtHm	-3.10557	5.15882	2.96232e-23	3.99342e-21				35.9299	83.3751	64.316	27.6874	52.6539	27.2267	60.8452	62.2606	75.2628	22.8777	19.0753	19.1319
BOKJ_1333800.1	sy867Hm	WtHm	-3.10784	8.29829	3.00862e-05	0.000222494	structural constituent of cuticle	-	Feminine	1135.96	53.344	236.111	15.5713	100.247	43.2632	215.013	244.99	184.201	87.3631	36.8513	48.2012
BOKJ_0225600.1	sy867Hm	WtHm	-3.12389	8.95566	3.19309e-52	2.74827e-49	NAD+ binding	3HCDH,3HCDH_N		913.525	1495.13	1504.83	1284.32	2278.2	1668.12	196.756	196.842	221.192	142.879	127.264	121.669
BOKJ_0408800.1	sy867Hm	WtHm	-3.13187	4.14707	2.13102e-24	3.40629e-22				68.9662	47.6156	59.71	118.207	125.093	114.052	161.509	109.794	204.624	7.00253	5.52673	4.29489
BOKJ_0998500.1	sy867Hm	WtHm	-3.1438	1.12302	4.51495e-09	8.87755e-08				11.1577	4.35435	8.98889	405.837	419.299	435.908	448.864	399.334	489.819	0.244332	1.68732	1.182
BOKJ_1192700.1	sy867Hm	WtHm	-3.15189	2.45522	1.91355e-06	1.9679e-05	structural constituent of cuticle	-	Feminine	6.27839	0.789642	12.2467	0.166091	2.18655	1.04027	7.16728	0.975164	3.46851	0.663813	0.569932	0.553839
BOKJ_0673400.1	sy867Hm	WtHm	-3.15648	1.30902	2.01034e-07	2.66512e-06	Neurotransmitter-gated ion-channel ligand binding domain	Neur_chan_LBD		3.24945	1.03989	10.0639	6.51377	2.71209	7.42502	2.48781	3.43935	2.47432	0.573992	0.372671	0.629343
BOKJ_1043500.1	sy867Hm	WtHm	-3.18247	1.15108	1.1224e-12	4.55019e-11				22.4486	14.1083	26.9946	499.702	578.779	308.266	0	13.1893	8.76059	12.3537	10.2529	15.9765
BOKJ_1000500.1	sy867Hm	WtHm	-3.20641	2.88957	1.78093e-25	3.06567e-23	RNA recognition motif	RRM_1	Feminine	25.2325	25.2007	21.3971	3.31354	2.92727	2.03084	2.90046	2.15792	2.57323	2.28367	2.64667	2.4883
BOKJ_0942200.1	sy867Hm	WtHm	-3.22506	0.134079	0.000964221	0.00423417				1.17066	0	4.09843	0	0	0.492729	0.555112	0.331657	1.0549	0.0742998	0.25193	0.23582
BOKJ_1246000.1	sy867Hm	WtHm	-3.23378	3.72229	3.34873e-24	5.20402e-22	Belongs to the arginase family	Arginase		41.4678	25.4942	34.577	34.0948	87.3923	55.0887	5.45263	5.05153	4.25823	3.87376	2.20454	2.94448
BOKJ_1053600.1	sy867Hm	WtHm	-3.23538	-1.30129	1.03961e-05	8.84067e-05	Protein of unknown function (DUF1647)	DUF1647		1.78306	0.228794	1.45949	0	2.52026	0	0.830835	0.0353764	0.168803	0.070978	0.0805002	0.0385198
BOKJ_0972000.1	sy867Hm	WtHm	-3.27121	0.138803	4.90565e-07	5.87051e-06		Branch		2.67839	1.79356	5.30678	3.51437	0.692584	4.56585	0.343004	0.139402	0.252107	0.535047	0.0399367	0.226958
BOKJ_0015400.1	sy867Hm	WtHm	-3.27975	0.778982	1.40476e-07	1.94282e-06	Collagen triple helix repeat (20 copies)	Col_cuticle_N,Collagen		2.83779	2.44284	10.5532	4.9857	1.50357	0.424288	2.08939	0.394101	0.380565	0.350053	0.720713	0.155094
BOKJ_1178400.1	sy867Hm	WtHm	-3.28109	-0.0730714	1.30014e-06	1.38809e-05	ganglioside catabolic process	-	Feminine	2.90999	0.24588	2.42182	0	0	0.901772	3.71426	0.321342	1.67678	0.241352	0.317748	0.260363
BOKJ_0396800.1	sy867Hm	WtHm	-3.31135	1.69653	1.81048e-14	9.73918e-13		Col_cuticle_N,Collagen		1.83754	0.0836326	0.480241	2.38227	1.08197	1.50408	0.0352229	0.0854106	0.0663394	0.0545256	0	0.0304672
BOKJ_1469600.1	sy867Hm	WtHm	-3.36016	-0.408694	9.59823e-10	2.20523e-08	Belongs to the amiloride-sensitive sodium channel (TC 1.A.6) family	-		4.72866	0.818024	6.566	0	0	6.18337	1.6332	2.97592	0.913858	0.78265	0.379579	0.362656
BOKJ_0529100.1	sy867Hm	WtHm	-3.3646	3.08095	5.97859e-10	1.43243e-08				105.869	62.834	59.9963	284.768	253.715	216.344	5.31031	13.7171	6.68892	7.70887	0.976511	8.24896
BOKJ_1019500.1	sy867Hm	WtHm	-3.36589	5.38053	5.41476e-43	3.18872e-40				459.384	764.974	783.509	35.6368	154.405	244.107	173.713	200.964	164.988	49.3222	55.1684	54.6523
BOKJ_1360600.1	sy867Hm	WtHm	-3.38267	4.01142	3.67111e-18	3.08842e-16				99.2752	33.8417	53.3683	149.742	193.571	130.523	4.04324	2.73054	2.7893	5.39444	4.61655	4.95555
BOKJ_0574800.1	sy867Hm	WtHm	-3.38513	2.03081	2.16846e-11	6.95213e-10	structural constituent of cuticle	-	Feminine	10.4011	8.37026	8.37846	0.313913	3.97355	0.330916	5.80925	5.34746	4.30853	1.24694	0.561963	0.212746
BOKJ_0898600.1	sy867Hm	WtHm	-3.41591	2.79435	1.45062e-12	5.75567e-11	Zona pellucida (ZP) domain	PAN_1	Feminine	6.39323	1.9422	2.60409	0.222403	0.806275	0.408721	1.39529	1.7183	1.08808	0.266622	0.286835	0.487508
BOKJ_0870300.1	sy867Hm	WtHm	-3.42287	6.5081	2.11286e-40	1.07458e-37				193.391	357.421	326.322	180.812	118.142	115.439	404.922	412.233	383.129	86.9753	89.9406	109.364
BOKJ_0529400.1	sy867Hm	WtHm	-3.42672	6.94688	1.37413e-17	1.06035e-15	Endonuclease/Exonuclease/phosphatase family	Exo_endo_phos	Feminine	165.936	434.67	352.868	31.5537	34.8487	129.084	31.4857	24.9108	30.1199	11.3247	28.1653	36.9889
BOKJ_0183000.1	sy867Hm	WtHm	-3.43328	1.71485	3.17097e-11	9.69397e-10	Histone H2B	Histone		10.7441	46.9239	26.6192	10.4152	16.2616	0	2.22321	7.71629	2.74829	3.53887	2.45269	1.98034
BOKJ_1448000.1	sy867Hm	WtHm	-3.4356	0.730978	5.74753e-09	1.10312e-07				4.36485	1.13642	1.59799	166.262	134.063	145.969	79.254	55.9862	80.2753	0.204975	0.312126	0.491604
BOKJ_1365700.1	sy867Hm	WtHm	-3.46444	1.99973	7.63238e-10	1.78281e-08	lipid transport	-		9.47635	2.08741	4.02513	1.61523	0	1.63119	1.70845	1.54112	1.6742	0.458009	0.543093	0.21447
BOKJ_0674600.1	sy867Hm	WtHm	-3.46776	2.00318	6.19153e-06	5.60948e-05	Ground-like domain	Ground-like		13.5317	3.62279	83.1059	6.7699	4.47944	17.3902	56.6446	1.50838	24.061	2.19414	2.35514	2.36667
BOKJ_0876100.1	sy867Hm	WtHm	-3.4741	-0.155241	0.000191551	0.00108399				1.45654	0.0685343	3.63415	0.0839261	0	0.0882735	3.66126	0.276651	1.04387	0.0900014	0.0255397	0.147133
BOKJ_0736800.1	sy867Hm	WtHm	-3.51047	9.97955	2.83065e-06	2.80284e-05		Col_cuticle_N	Feminine	3470.68	169.899	518.47	57.9834	482.398	312.323	502.734	634.173	449.334	195.411	103.683	126.697
BOKJ_1075900.1	sy867Hm	WtHm	-3.5288	1.05874	4.54794e-05	0.000315676	Flavin-binding monooxygenase-like	FMO-like		0.979777	0.333045	8.21637	0.699569	0	0.652892	1.57223	0.290924	1.17495	0.265281	0.22507	0.21619
BOKJ_0522900.1	sy867Hm	WtHm	-3.54175	1.80355	2.15261e-19	2.23014e-17	Coiled-coil domain-containing protein 154	CCDC154		3.24364	4.67932	4.73543	0.631874	8.06193	3.46636	0.538919	0.670105	0.656616	0.171889	0.336414	0.237197
BOKJ_0740600.1	sy867Hm	WtHm	-3.54918	7.38183	5.28826e-06	4.88607e-05		Col_cuticle_N,Collagen	Feminine	756.567	27.3182	160.868	12.1157	104.458	49.2828	121.58	121.388	99.6941	39.7265	21.0858	16.3498
BOKJ_0870400.1	sy867Hm	WtHm	-3.56349	4.61493	9.78127e-19	9.31001e-17				5.79497	0	6.47322	14.6924	0	0	5.69815	11.6127	7.50749	5.87772	5.64672	7.83015
BOKJ_0900200.1	sy867Hm	WtHm	-3.57555	-0.410485	2.65859e-08	4.36173e-07	-	-	Feminine	5.29567	0.480489	6.91281	0	0	0	2.96957	0.511715	1.38662	0	0.166654	0.478123
BOKJ_0405200.1	sy867Hm	WtHm	-3.59938	-0.479865	1.01622e-07	1.46715e-06				14.3745	0	0	0	0	130.652	24.844	29.0168	19.0392	0	3.4134	1.6059
BOKJ_1349200.1	sy867Hm	WtHm	-3.6244	6.95393	8.70648e-26	1.52214e-23	Belongs to the peptidase C1 family	Peptidase_C1		456.311	162.705	473.766	77.2933	185.94	141.96	585.311	506.634	530.874	30.9296	24.4891	19.4811
BOKJ_0072000.1	sy867Hm	WtHm	-3.63438	6.26499	3.56956e-81	9.98495e-78	Belongs to the mitochondrial carrier (TC 2.A.29) family	Mito_carr		214.321	265.522	268.456	161.298	480.737	240.182	241.069	230.142	243.461	20.8179	17.2492	15.263
BOKJ_0504200.1	sy867Hm	WtHm	-3.64084	0.48082	4.88101e-05	0.000335053	Frag1/DRAM/Sfk1 family	Frag1		3.62249	0.33235	14.7457	0	0	1.27003	3.51735	0.50025	1.62246	0.542198	0.497254	0.242182
BOKJ_0689800.1	sy867Hm	WtHm	-3.65761	0.446162	1.02727e-07	1.47929e-06	hydrolase activity	Lipase_2		3.27485	0.860606	7.87613	0	4.76608	0	4.63085	0.512102	2.66047	0.29192	0.141972	0.320539
BOKJ_0450500.1	sy867Hm	WtHm	-3.72505	0.937695	1.54804e-18	1.43149e-16	doxorubicin transport	RhoGAP		2.049	1.11456	3.11287	2.27928	0.286509	0.265482	0.173779	0.140683	0	0.42435	0.639676	0.536005
BOKJ_0991900.1	sy867Hm	WtHm	-3.73901	4.42305	8.91511e-39	4.1563e-36	Belongs to the peptidase C1 family	Inhibitor_I29,Peptidase_C1	Masculine	56.7133	42.0354	46.9749	133.158	1259.21	187.968	3.88679	8.35857	5.37787	2.39729	3.36254	4.131
BOKJ_1308600.1	sy867Hm	WtHm	-3.74395	5.51614	1.25468e-58	1.75483e-55	-	-	Feminine	53.7945	39.1339	37.3827	11.17	11.7261	10.3948	12.1094	17.7156	11.3263	3.53576	2.75073	2.65183
BOKJ_1274200.1	sy867Hm	WtHm	-3.74806	-1.2611	2.20098e-08	3.68664e-07	-	-		3.51333	0.880934	2.32145	0	5.79901	0	2.59101	0.737471	1.89418	0.375168	0.142699	0.137265
BOKJ_1104700.1	sy867Hm	WtHm	-3.7591	3.70953	4.627e-07	5.58484e-06	Hint module	Hint	Feminine	9.11586	0.300852	5.766	0.111708	0	0.33421	2.90971	0.330614	1.70446	0.257165	0.270855	0.345367
BOKJ_0857500.1	sy867Hm	WtHm	-3.77354	3.07655	2.3888e-31	6.85342e-29	transmembrane transport	MFS_1		12.657	11.0103	13.4549	32.2798	44.2141	39.0817	49.5191	34.6163	49.1219	1.17633	0.723735	0.801511
BOKJ_1241500.1	sy867Hm	WtHm	-3.79676	3.87381	3.14882e-14	1.62065e-12	Belongs to the heat shock protein 70 family	HSP70		5.66905	14.0362	32.9172	58.2252	87.8737	51.8735	156.052	162.589	159.406	0.864434	1.06183	1.14474
BOKJ_1327100.1	sy867Hm	WtHm	-3.87809	3.75211	7.8437e-18	6.31124e-16	protein deglutathionylation	Thioredoxin,Thioredoxin_6	Feminine	15.1191	19.0719	44.2582	6.75207	4.90267	7.62268	3.68354	2.66269	2.39942	0.80803	1.66825	1.71013
BOKJ_1059000.1	sy867Hm	WtHm	-3.90325	8.42494	7.34007e-98	2.7376e-94	Belongs to the type-B carboxylesterase lipase family	COesterase		345.875	520.064	478.837	136.714	367.854	276.159	257.676	275.947	316.296	26.2062	24.6785	26.6028
BOKJ_0926200.1	sy867Hm	WtHm	-3.91814	-0.922558	2.61633e-09	5.41112e-08	SCP / Tpx-1 / Ag5 / PR-1 / Sc7 family of extracellular domains.	CAP	Masculine	2.11079	0	0.66986	4.82262	38.1414	9.59238	0.117783	0.158058	0.150413	0	0	0.0345215
BOKJ_1384300.1	sy867Hm	WtHm	-3.91846	4.44043	2.63906e-21	3.1751e-19	-	DUF4817		115.715	331.061	256.805	13.568	134.223	80.268	231.079	190.776	228.313	11.9712	21.791	36.8985
BOKJ_0913300.1	sy867Hm	WtHm	-3.92364	0.568809	7.3342e-10	1.71679e-08				15.1601	0	9.12279	0	0	0	7.79616	3.84113	18.3496	5.984	2.21189	1.39591
BOKJ_0480200.1	sy867Hm	WtHm	-3.94806	5.94009	3.45287e-30	9.42297e-28	-	-		161.952	326.838	337.688	198.881	114.561	66.9503	284.939	206.861	334.242	19.6549	39.6081	16.2948
BOKJ_0993700.1	sy867Hm	WtHm	-3.95845	-0.200742	6.44821e-10	1.52858e-08	Nematode cuticle collagen N-terminal domain	Col_cuticle_N,Collagen		1.64181	1.04914	3.46966	1.09934	0	0.38436	1.44534	0.821297	0.812071	0.127934	0	0.199071
BOKJ_0396700.1	sy867Hm	WtHm	-3.98087	2.19154	1.79955e-08	3.1025e-07		Col_cuticle_N,Collagen		8.98658	1.17124	1.15297	1.94985	3.12684	3.24084	0.317278	0.341933	0.365182	0.136428	0.219086	0.487893
BOKJ_0076100.1	sy867Hm	WtHm	-3.98414	5.01828	5.58539e-10	1.34406e-08	structural constituent of cuticle	Col_cuticle_N		125.13	9.41995	50.7646	2.15283	29.9046	21.9697	9.7142	26.27	7.70797	4.13257	3.59819	2.54059
BOKJ_1186300.1	sy867Hm	WtHm	-4.02375	5.55759	2.7469e-48	1.92094e-45	transferase activity	GST_C_3,GST_N		274.82	172.496	299.817	9.65854	106.127	184.204	42.0748	41.8811	46.1836	12.178	14.5225	17.1746
BOKJ_0945700.1	sy867Hm	WtHm	-4.07193	5.51901	2.46037e-11	7.75691e-10		Col_cuticle_N,Collagen		176.312	16.2663	69.2678	0.523721	47.8238	30.6538	16.1804	37.3208	8.07369	3.45163	5.74848	6.05348
BOKJ_0831900.1	sy867Hm	WtHm	-4.07621	2.23779	3.27965e-05	0.000238596	structural constituent of cuticle	-		4.24988	0.174265	27.4459	0	5.20241	2.7724	15.0379	0.28479	5.56472	0.477756	0.449844	0.403732
BOKJ_0586300.1	sy867Hm	WtHm	-4.0977	7.98088	9.95069e-49	7.42255e-46	pectate lyase activity	Pectate_lyase		1011.12	855.197	1024.38	2301.63	4451	2768.58	123.9	215.223	105.031	37.2731	43.5752	83.0177
BOKJ_0179800.1	sy867Hm	WtHm	-4.10721	4.47861	4.5165e-09	8.87755e-08	biological adhesion	-		104.275	7.95668	23.5667	6.21022	35.1969	20.1569	5.13523	13.6852	3.76514	2.56673	2.61972	1.93079
BOKJ_0740200.1	sy867Hm	WtHm	-4.10757	2.31626	3.76513e-05	0.00026799	structural constituent of cuticle	Col_cuticle_N,Collagen	Feminine	20.6737	0.503634	1.08609	0.201761	1.14198	0.420437	0.407883	0.385125	0.339047	0.515044	0.361255	0.248919
BOKJ_0173700.1	sy867Hm	WtHm	-4.1178	0.691263	1.30571e-07	1.8262e-06		Col_cuticle_N,Collagen	Feminine	4.28831	0.602542	10.6319	0	0	0	8.98542	0.546526	2.92742	0.0978473	0.150601	0.25717
BOKJ_0713700.1	sy867Hm	WtHm	-4.11813	5.53447	6.82381e-55	7.63516e-52	SCP / Tpx-1 / Ag5 / PR-1 / Sc7 family of extracellular domains.	CAP	Masculine	72.064	73.8912	96.3191	165.984	1589.36	227.262	4.74311	4.7449	4.51608	2.15511	4.23109	4.55098
BOKJ_0792100.1	sy867Hm	WtHm	-4.14229	1.08418	3.79125e-06	3.63499e-05				11.3841	0	3.97554	0.115499	0	0.122195	0.481353	0.488304	0.353033	0.231346	0.222947	0.389629
BOKJ_0390500.1	sy867Hm	WtHm	-4.16863	4.02736	5.24435e-13	2.2143e-11				26.6756	11.316	17.9512	0.71004	7.05428	9.86843	0.981331	0.699756	1.48914	0.188311	1.44039	1.35223
BOKJ_0120800.1	sy867Hm	WtHm	-4.17585	3.01355	5.42316e-12	1.92634e-10				37.1401	6.82708	84.8886	2.12168	15.647	7.32737	30.9666	3.12248	14.2101	3.44981	1.61084	2.18492
BOKJ_0786900.1	sy867Hm	WtHm	-4.21309	2.43831	5.08195e-12	1.8225e-10	-	-	Feminine	21.304	2.77806	10.7934	0.795127	1.88791	2.65205	8.00471	3.23217	5.65796	0.586535	0.496207	0.582679
BOKJ_0737000.1	sy867Hm	WtHm	-4.21812	2.58212	3.49476e-08	5.65889e-07	transmembrane transport	-	Feminine	10.0288	2.91989	59.4765	0	0	4.65064	51.7096	1.25319	19.0279	0.510845	0.64225	1.11037
BOKJ_1464400.1	sy867Hm	WtHm	-4.25166	-0.63818	6.11086e-11	1.77881e-09				2.62213	10.6623	9.33865	3.60477	8.90409	1.91673	0.247007	0.149692	0.17771	0.249556	0.170518	0.109048
BOKJ_1226300.1	sy867Hm	WtHm	-4.25261	3.73498	8.33864e-10	1.93571e-08	Ground-like domain	Ground-like	Feminine	9.06387	2.15837	38.088	2.37588	2.66952	2.64059	19.2526	1.64452	11.0254	0.607895	0.796529	0.906781
BOKJ_0713600.1	sy867Hm	WtHm	-4.2842	0.342629	1.10102e-15	6.62328e-14	Belongs to the CRISP family	CAP	Masculine	6.81702	2.05231	2.73339	17.0319	159.709	22.1338	0.155724	0.125759	0.187043	0.249956	0.177369	0
BOKJ_0984100.1	sy867Hm	WtHm	-4.30023	4.12674	5.11288e-37	2.20031e-34	Belongs to the peptidase C1 family	Inhibitor_I29,Peptidase_C1	Masculine	37.5895	53.3998	58.6981	93.3628	561.27	133.111	3.7328	2.61124	2.95882	1.10661	2.85832	2.06402
BOKJ_0062500.1	sy867Hm	WtHm	-4.35019	2.34144	3.03628e-07	3.84745e-06	Zona pellucida (ZP) domain	Zona_pellucida	Feminine	6.84091	0.390272	31.7991	0	0	0	24.8707	0.568125	15.0527	0.502688	0.392914	0.482866
BOKJ_0220800.1	sy867Hm	WtHm	-4.36676	1.68978	1.38173e-07	1.91813e-06	structural constituent of cuticle	-	Feminine	7.46942	0.419408	13.7948	0	0	0.337268	3.02789	0.750167	1.21008	0.360335	0.276099	0.336729
BOKJ_1367000.1	sy867Hm	WtHm	-4.36932	0.938127	2.4071e-06	2.41769e-05	divergent subfamily of APPLE domains	PAN_1		1.50911	0.327672	7.68308	0	2.21456	0.453058	3.32662	0.574869	1.67661	0.0820079	0.162413	0.17733
BOKJ_0094700.1	sy867Hm	WtHm	-4.37508	-0.547108	7.10692e-09	1.33422e-07		Col_cuticle_N,Collagen	Feminine	22.3985	0.304858	11.833	0.610454	0.558712	0.514731	0.179619	0.224465	0.24738	0.248292	0.178234	0.120745
BOKJ_0011700.1	sy867Hm	WtHm	-4.41342	0.910018	5.80383e-11	1.71796e-09	DB module	DB		3.27829	0.806477	5.8585	0	0.554237	1.51697	2.40765	0.222072	1.35212	0.0792871	0.135746	0.0654942
BOKJ_0383300.1	sy867Hm	WtHm	-4.45433	9.37483	2.23854e-105	1.25235e-101	catalytic activity	AMP-binding,AMP-binding_C		857.374	768.89	848.337	185.165	710.598	331.64	695.677	775.867	777.576	44.9692	33.5349	28.9053
BOKJ_0984200.1	sy867Hm	WtHm	-4.46296	3.07123	1.76889e-31	5.20846e-29	Belongs to the peptidase C1 family	Inhibitor_I29,Peptidase_C1	Masculine	7.38659	6.35576	9.63227	19.0157	154.824	26.9307	0.563211	0.457982	0.317722	0.268016	0.43155	0.412357
BOKJ_1216500.1	sy867Hm	WtHm	-4.46866	-0.294496	1.49413e-09	3.2525e-08	Zinc-dependent metalloprotease	Astacin		1.87085	0.666585	2.98511	0.630825	0	0.667081	0.589746	0.159248	0.351284	0.132947	0.0301786	0
BOKJ_0313200.1	sy867Hm	WtHm	-4.53784	1.50898	1.60401e-10	4.27316e-09	DB module	DB	Feminine	9.58219	1.66146	7.57041	0	0	0	24.5568	1.8698	8.14909	0.476096	0	1.04179
BOKJ_1388800.1	sy867Hm	WtHm	-4.56457	6.93285	1.22215e-36	4.88379e-34	Lytic transglycolase	-		775.801	628.256	923.136	637.131	1651.49	949.883	323.011	334.303	262.349	13.4457	38.0147	40.8074
BOKJ_0298000.1	sy867Hm	WtHm	-4.58191	-0.560008	2.19185e-12	8.31344e-11	procollagen-proline 4-dioxygenase activity	2OG-FeII_Oxy_3,P4Ha_N		1.04417	1.51075	4.99256	2.60441	0.627429	4.52975	0.299288	0.383258	0.411567	0.0801629	0.0682141	0.02178
BOKJ_0069200.1	sy867Hm	WtHm	-4.59375	6.68049	5.91326e-37	2.4505e-34				255.686	550.629	812.789	127.503	585.415	489.081	699.078	723.106	690.101	51.3262	63.2756	72.9981
BOKJ_1216700.1	sy867Hm	WtHm	-4.64968	-0.486481	5.80661e-09	1.1106e-07	Zinc-dependent metalloprotease	-		0.983976	0.162423	0.992487	0	0	0	0.48898	0.261197	0.501595	0.0631108	0.0730063	0.0355316
BOKJ_1485000.1	sy867Hm	WtHm	-4.67984	11.9126	1.02292e-54	1.04049e-51	Thioredoxin-dependent peroxide reductase	-		11618.5	14368.4	27767.3	51256	54923.1	43658	1811.27	1515.07	2038.28	1363.15	1173.41	896.116
BOKJ_0274300.1	sy867Hm	WtHm	-4.70278	0.285	5.43566e-07	6.42914e-06				6.03083	0.121803	6.34184	0	0	0	0.0440915	0.106578	0.214801	0.0356685	0.161228	0.038413
BOKJ_1328900.1	sy867Hm	WtHm	-4.73777	0.144089	3.07891e-09	6.27504e-08	Astacin (Peptidase family M12A)	Astacin		1.39971	0.204656	1.92546	0.573943	0	0	1.38913	0.425068	0.604431	0.0419456	0.0318413	0.0460434
BOKJ_1251400.1	sy867Hm	WtHm	-4.80419	0.523831	3.21928e-09	6.50191e-08	divergent subfamily of APPLE domains	PAN_1		1.96835	0.160943	1.2371	0	1.14156	1.12633	0.813503	0.281347	0.605921	0.0176439	0.0199608	0.0666
BOKJ_0396900.1	sy867Hm	WtHm	-4.81104	2.36573	1.41391e-28	3.04235e-26	Nematode cuticle collagen N-terminal domain	Col_cuticle_N,Collagen	Feminine	11.8742	9.57269	15.9817	0.350604	1.95297	0.494083	8.91893	1.54253	4.51446	0.238943	0.38031	0.542607
BOKJ_1316800.1	sy867Hm	WtHm	-4.82086	4.35262	2.02154e-35	7.06845e-33	Glycoside hydrolase family 45 protein	Glyco_hydro_45		79.4463	99.0297	85.808	41.3072	195.721	79.9054	0.364819	6.36191	0.47945	3.37645	1.06804	1.879
BOKJ_1161700.1	sy867Hm	WtHm	-4.83415	1.37705	1.10027e-08	1.98953e-07	peptidase inhibitor activity	CAP	Feminine	7.39664	0.812519	12.3594	0	0.177224	0	20.0122	19.4725	14.935	0.549826	0	0.0463349
BOKJ_0169300.1	sy867Hm	WtHm	-4.87095	3.37558	4.50338e-14	2.18131e-12		Col_cuticle_N,Collagen	Feminine	19.7044	3.0558	27.5674	0.332409	3.80382	1.81528	1.02114	10.3526	0.366839	0.669179	0.665219	0.310586
BOKJ_0062400.1	sy867Hm	WtHm	-4.88605	3.2556	5.25783e-10	1.27614e-08	Zona pellucida (ZP) domain	Zona_pellucida	Feminine	15.746	1.79473	40.3376	2.30172	0.128034	0.485895	24.2289	0.303809	11.4686	0.603249	0.378415	0.433263
BOKJ_1316700.1	sy867Hm	WtHm	-4.89555	5.02186	2.02231e-29	4.81438e-27	Glycoside hydrolase family 45 protein	Glyco_hydro_45		121.368	141.356	141.014	96.2832	198.987	127.931	0.587469	10.7756	1.1709	4.50885	1.20996	2.09015
BOKJ_1249200.1	sy867Hm	WtHm	-4.98426	-0.437842	1.83312e-06	1.8904e-05	-	-		3.51441	0	4.97886	0.83678	0	0.297468	0.434982	0.0392067	0	0.0796568	0	0
BOKJ_0441000.1	sy867Hm	WtHm	-4.98842	3.68444	6.23239e-10	1.48371e-08		Col_cuticle_N,Collagen	Feminine	20.3376	1.37995	45.8303	0.291045	0	0.302115	21.8783	0.728505	10.6344	0.697983	0.602453	0.668528
BOKJ_0781300.1	sy867Hm	WtHm	-5.00169	3.23668	2.77016e-11	8.60982e-10	-	-	Feminine	23.5332	1.48592	9.80482	0.949715	3.66085	2.23813	1.3159	3.55662	0.654103	0.196515	0.379612	0.352601
BOKJ_0141400.1	sy867Hm	WtHm	-5.02015	0.715337	8.48688e-08	1.24619e-06	glycoprotein 6-alpha-L-fucosyltransferase activity	-	Feminine	15.5952	0.894833	38.6097	0	0	0	36.2975	0.33861	16.8693	0.346129	0.654264	0.375126
BOKJ_0816000.1	sy867Hm	WtHm	-5.03753	2.17147	1.93945e-09	4.11675e-08	Ground-like domain	Ground-like	Feminine	23.2877	7.29537	147.296	0	0	14.3467	84.3337	6.24684	42.3338	1.42859	1.20355	3.04871
BOKJ_0944000.1	sy867Hm	WtHm	-5.07041	2.69834	3.67113e-12	1.35119e-10	-	-		3.54345	58.1446	27.2462	0	14.0168	9.79493	10.9437	9.99887	7.05776	0.484118	0.793464	0.409645
BOKJ_0780600.1	sy867Hm	WtHm	-5.0931	5.32691	1.1243e-33	3.81207e-31				60.6077	221.473	168.434	28.8283	66.9517	73.2862	78.5095	74.1094	108.777	16.9612	19.0957	11.0034
BOKJ_0396500.1	sy867Hm	WtHm	-5.15979	3.09417	1.95195e-07	2.61248e-06	structural constituent of cuticle	-	Feminine	43.0859	1.19441	4.44198	2.42616	0	0.424489	0.613041	0.870903	0.340169	0.777645	0.351921	0.218437
BOKJ_1003000.1	sy867Hm	WtHm	-5.23306	0.944652	4.93102e-14	2.35783e-12	structural constituent of cuticle	Collagen		3.56663	0.876593	6.50671	3.16083	0	1.63376	3.69961	1.10842	2.7878	0.0534441	0.187718	0.0615751
BOKJ_0947700.1	sy867Hm	WtHm	-5.28506	3.59413	6.62443e-12	2.30906e-10	Ground-like domain	Ground-like	Feminine	54.1116	3.19388	55.1416	2.55625	0	0.850441	1.36604	0.963215	1.26883	0.930777	0.734483	0.861165
BOKJ_0831800.1	sy867Hm	WtHm	-5.38132	2.93621	2.3057e-09	4.83117e-08	structural constituent of cuticle	-	Feminine	20.5457	0.770001	34.187	0	0	0	0.267412	0.373166	0.258053	0.274438	0.346163	0.167147
BOKJ_1238300.1	sy867Hm	WtHm	-5.50543	2.44197	1.05175e-19	1.11019e-17				26.9765	6.03437	9.75841	0	0.654071	0.902523	2.06199	0.402147	1.70525	0.340734	0.133214	0.351014
BOKJ_1249300.1	sy867Hm	WtHm	-5.54854	3.32435	2.63775e-47	1.73611e-44	Oxidoreductase family, NAD-binding Rossmann fold	GFO_IDH_MocA	Feminine	24.3482	28.1666	35.593	0	7.71182	9.56101	3.5357	2.90828	2.94823	0.403513	0.639894	0.657343
BOKJ_1251700.1	sy867Hm	WtHm	-5.56752	1.74324	1.82009e-08	3.13136e-07	Belongs to the peptidase C1 family	Peptidase_C1	Feminine	3.06478	0.126495	22.4163	0	1.439	0	26.4964	0.160697	9.58429	0.0800193	0.2272	0.17538
BOKJ_0740700.1	sy867Hm	WtHm	-5.58148	0.413726	1.12225e-08	2.02531e-07	structural constituent of cuticle	Col_cuticle_N,Collagen	Feminine	4.05651	0.17755	5.40401	0	0	0	5.85825	0.0308209	2.68021	0.059624	0	0.133309
BOKJ_0805800.1	sy867Hm	WtHm	-5.59965	6.96653	2.19809e-58	2.73271e-55	Succinyl-CoA synthetase functions in the citric acid cycle (TCA), coupling the hydrolysis of succinyl-CoA to the synthesis of either ATP or GTP and thus represents the only step of substrate-level phosphorylation in the TCA. The alpha subunit of the enzyme binds the substrates coenzyme A and phosphate, while succinate binding and specificity for either ATP or GTP is provided by different beta sub…	CoA_binding,Ligase_CoA	Feminine	134.863	389.389	334.442	25.7654	130.08	64.3419	201.66	163.471	233.574	5.16819	6.03354	4.91753
BOKJ_0173100.1	sy867Hm	WtHm	-5.60104	4.19899	1.98347e-11	6.39568e-10	structural constituent of cuticle	Col_cuticle_N,Collagen	Feminine	16.2415	0.84865	28.4157	0.216439	0.0815014	1.01534	2.66152	0.541653	1.21018	0.289675	0.264281	0.245872
BOKJ_1152200.1	sy867Hm	WtHm	-5.66595	6.96718	4.99093e-128	5.58435e-124	catalytic activity	AMP-binding,AMP-binding_C		105.791	142.332	145.775	26.8802	75.0481	37.5277	67.0832	71.0106	58.2538	1.7836	1.50774	2.6293
BOKJ_1282900.1	sy867Hm	WtHm	-5.67504	2.37999	5.24712e-09	1.01927e-07				49.0587	0.76086	54.5786	3.63708	0	0	31.6003	1.38872	8.73736	0.0704441	0.792817	0.376905
BOKJ_0076300.1	sy867Hm	WtHm	-5.7282	3.26693	2.16448e-08	3.64186e-07	structural constituent of cuticle	Col_cuticle_N,Collagen	Feminine	47.3078	1.69036	3.35236	0	1.80239	1.28193	1.13189	1.09745	0.463808	0.408352	0.287722	0.127354
BOKJ_1406900.1	sy867Hm	WtHm	-5.77391	4.43463	2.86039e-09	5.8617e-08	structural constituent of cuticle	Collagen	Feminine	82.9013	1.13517	55.1885	0	1.93043	0.454414	1.57567	0.339002	0.327075	0.560608	0.614022	0.928104
BOKJ_0944100.1	sy867Hm	WtHm	-5.81981	3.00319	5.10496e-14	2.42031e-12	-	-	Feminine	5.78745	67.8911	26.9184	0	4.48324	3.1898	5.83274	5.24814	3.83925	0	0.759056	0.242829
BOKJ_0076400.1	sy867Hm	WtHm	-5.84777	4.78915	1.54983e-08	2.70109e-07	structural constituent of cuticle	Col_cuticle_N,Collagen	Feminine	70.4965	0.472046	73.0339	1.63531	0	0.913917	6.1266	0.876737	2.31072	0.893768	0.594447	0.656534
BOKJ_0195300.1	sy867Hm	WtHm	-5.87581	7.42977	5.61569e-15	3.11059e-13		Col_cuticle_N,Collagen	Feminine	324.452	14.096	122.646	1.17267	16.9165	3.2971	36.1389	23.4741	19.6642	3.50746	2.88842	2.63514
BOKJ_0001800.1	sy867Hm	WtHm	-5.90057	0.730512	1.90412e-08	3.25271e-07	MADF	MADF_DNA_bdg		1.79529	0	6.66445	0.353676	0	0	1.84599	0.12379	1.05159	0.0485108	0.0556415	0.053884
BOKJ_0195200.1	sy867Hm	WtHm	-5.91463	6.61212	1.29072e-15	7.68186e-14		Col_cuticle_N,Collagen	Feminine	317.425	16.6475	184.189	4.79905	15.7423	6.91525	39.2095	14.769	19.0281	3.19759	2.83835	2.35924
BOKJ_0819500.1	sy867Hm	WtHm	-5.92086	4.58458	2.4236e-10	6.1488e-09	Ground-like domain	Ground-like	Feminine	10.0443	1.76824	66.7754	0.393568	0.504609	0	28.2584	0.689856	10.3811	0.435706	0.526891	0.26661
BOKJ_1333400.1	sy867Hm	WtHm	-5.95528	3.81517	2.54391e-11	7.97305e-10	structural constituent of cuticle	-	Feminine	39.2129	1.75229	54.1592	0	0	1.34424	0.322839	0.494453	0.447154	0.485293	0.552453	0.312893
BOKJ_0173000.1	sy867Hm	WtHm	-5.98351	-0.0500185	6.60853e-12	2.30906e-10		Col_cuticle_N	Feminine	4.14991	1.71671	0.644776	0	0	0	0	0.075902	0.118089	0	0	0.0547016
BOKJ_0659600.1	sy867Hm	WtHm	-6.10038	2.12027	1.45476e-13	6.59002e-12	Collagen triple helix repeat (20 copies)	Col_cuticle_N,Collagen	Feminine	21.3302	2.60353	5.0652	0	0	0	0.545705	0.292539	0.476171	0.0559923	0.226531	0.0947787
BOKJ_0376100.1	sy867Hm	WtHm	-6.1454	3.09221	4.79516e-50	3.83236e-47	Belongs to the peptidase A1 family	Asp		22.1965	32.6279	33.7007	7.41109	32.27	17.8921	17.1336	11.0559	14.0482	0.224688	0.402153	0.284505
BOKJ_0654100.1	sy867Hm	WtHm	-6.25932	0.205235	4.11369e-09	8.24876e-08	-	-	Feminine	16.2166	0.261353	6.76655	0	0	0	2.31927	0.215767	0.77033	0.0713591	0.0813788	0
BOKJ_1468100.1	sy867Hm	WtHm	-6.45049	-0.837272	4.04245e-14	1.98382e-12	doxorubicin transport	RhoGAP		1.4343	0.668739	0	0	0	0	0	0	0	0	0	0
BOKJ_0076200.1	sy867Hm	WtHm	-6.46749	3.65659	5.37764e-15	3.00413e-13	structural constituent of cuticle	Col_cuticle_N,Collagen	Feminine	55.1564	3.84435	16.6791	0.285351	0	1.20421	0.827204	4.5602	0.719	0.155283	0.386344	0.260028
BOKJ_0422100.1	sy867Hm	WtHm	-6.48384	2.08163	4.43882e-09	8.79043e-08	intein-mediated protein splicing	-	Feminine	4.43345	0.164137	16.253	0	0	0	6.07039	0.0553226	4.20538	0.0543084	0.103124	0
BOKJ_1148000.1	sy867Hm	WtHm	-6.53451	1.59306	1.69457e-11	5.47992e-10		Col_cuticle_N,Collagen	Feminine	3.30626	1.18676	15.8711	0	0	0.208022	6.01053	0.114931	2.28403	0.138989	0.0321584	0
BOKJ_0832100.1	sy867Hm	WtHm	-7.04468	2.83658	1.153e-08	2.07425e-07	structural constituent of cuticle	-	Feminine	28.316	0	16.1058	0.61604	0.678543	0	0.0688498	0.221999	0.195118	0	0.123771	0.0600315
BOKJ_0321300.1	sy867Hm	WtHm	-7.08215	3.80772	2.74203e-63	4.38294e-60	-	-	Feminine	52.5918	69.4965	67.293	0	4.35787	5.26978	72.7081	71.5763	67.0981	0.0510765	0.86753	0.223173
BOKJ_0417900.1	sy867Hm	WtHm	-7.10412	5.27921	1.39641e-13	6.35139e-12		Collagen	Feminine	175.785	4.0204	70.8304	0.116638	0	0.485353	3.4355	3.42485	0.943014	0.627016	0.545128	0.425375
BOKJ_0193000.1	sy867Hm	WtHm	-7.1989	2.99492	1.2358e-08	2.19832e-07	structural constituent of cuticle	Col_cuticle_N	Feminine	18.5296	0.242216	34.4985	0	0.118743	1.21962	0.326628	0.261825	0.271319	0.0276198	0.0319524	0.187578
BOKJ_0062600.1	sy867Hm	WtHm	-7.21418	4.04582	7.61629e-16	4.73437e-14	Zona pellucida (ZP) domain	Zona_pellucida	Feminine	36.6849	3.34301	77.8726	0.652707	0	0.68631	36.9313	0.597733	15.3385	0.265099	0.167867	0.163076
BOKJ_1052600.1	sy867Hm	WtHm	-7.22343	3.43272	3.09411e-12	1.14636e-10				72.7406	2.69573	147.129	2.75268	0	0	51.4349	0.533536	20.9597	0.342139	0.296893	0.678668
BOKJ_0172900.1	sy867Hm	WtHm	-7.29063	4.41598	1.16165e-11	3.83414e-10	structural constituent of cuticle	Col_cuticle_N,Collagen	Feminine	71.2674	0.592916	67.9674	1.82278	0	0	0.45297	0.245786	0.346065	0.263138	0.163375	0.23669
BOKJ_0321200.1	sy867Hm	WtHm	-7.38896	3.88844	9.21163e-80	2.06138e-76	-	-	Feminine	59.6749	58.3184	61.6828	0	3.23738	1.25048	73.5128	67.0621	62.9229	0.152106	0.689164	0.166198
BOKJ_0676900.1	sy867Hm	WtHm	-7.82873	2.7888	1.63647e-11	5.30737e-10	DB module	DB		68.5244	1.12229	14.44	12.5747	14.3461	1.67362	3.12475	3.152	2.30082	0.0688039	0.0788256	0.153196
BOKJ_0415000.1	sy867Hm	WtHm	-7.8684	-0.977833	6.43023e-08	9.78882e-07	DB module	DB		5.64879	0	2.88957	0	0	0	0.744741	0.120925	0.427618	0	0	0
BOKJ_1027900.1	sy867Hm	WtHm	-8.05002	2.73295	1.81485e-16	1.19449e-14				84.5219	23.0304	704.889	0	0	0	303.835	0.599292	136.435	0.611739	0	0.654812
BOKJ_1028000.1	sy867Hm	WtHm	-8.05306	2.99343	4.7916e-13	2.0308e-11				112.311	7.49807	692.989	0	0	0	417.65	7.31314	206.104	1.24206	1.40128	0
BOKJ_1002200.1	sy867Hm	WtHm	-8.10975	1.66132	2.33847e-08	3.90524e-07	structural constituent of cuticle	Col_cuticle_N,Collagen	Feminine	14.7428	0	3.07726	0	0	0	0.0653077	0.0525214	0.0612073	0	0	0.0567407
BOKJ_1117200.1	sy867Hm	WtHm	-8.11521	5.54218	2.28945e-18	2.05674e-16	structural constituent of collagen and cuticulin-based cuticle	Col_cuticle_N	Feminine	58.911	6.05334	150.877	2.17276	0	0.940476	60.0563	0.751447	30.4857	0.372796	0.134744	0.173973
BOKJ_0943800.1	sy867Hm	WtHm	-8.1442	-0.731682	3.94837e-12	1.43903e-10	-	-		0.799156	4.62505	5.90144	0	4.17919	0.834079	5.0595	4.02566	3.82464	0	0	0
BOKJ_1390800.1	sy867Hm	WtHm	-8.20997	0.956887	1.43928e-30	4.02604e-28				0	0	0.478475	0	0.542294	0	0	0.250383	0	0	0	0.564792
BOKJ_0786100.1	sy867Hm	WtHm	-8.233	3.77321	3.39846e-18	2.92503e-16	Nematode cuticle collagen N-terminal domain	Col_cuticle_N,Collagen	Feminine	19.5455	1.91664	39.3251	0.0641295	0	0.267945	18.1311	0.314844	6.91804	0.0177509	0.102314	0.0399235
BOKJ_0832000.1	sy867Hm	WtHm	-8.40235	3.93812	3.54374e-10	8.77232e-09	structural constituent of cuticle	-	Feminine	57.69	0.40493	32.0434	0	2.48538	0	0.208521	0.224238	0.0328609	0.0544977	0	0.151731
BOKJ_1214800.1	sy867Hm	WtHm	-8.45774	3.16941	1.99655e-15	1.1696e-13	Nematode cuticle collagen N-terminal domain	Col_cuticle_N,Collagen	Feminine	1.1153	0	1.59142	0	0	0	0.296065	0	0.160985	0	0	0
BOKJ_0648300.1	sy867Hm	WtHm	-8.59485	4.84734	4.64386e-14	2.23966e-12		Col_cuticle_N,Collagen	Feminine	85.9391	0.945165	66.5684	0	0	0.102629	8.42424	0.471158	1.76825	0.132435	0.183747	0.0893844
BOKJ_1214700.1	sy867Hm	WtHm	-8.60433	1.34431	2.27694e-11	7.25831e-10	Nematode cuticle collagen N-terminal domain	Col_cuticle_N,Collagen	Feminine	1.02951	0.101796	2.84183	0	0	0	0.33836	0	0.120739	0	0	0
BOKJ_0658600.1	sy867Hm	WtHm	-8.73131	5.71529	4.6026e-18	3.83244e-16	Collagen triple helix repeat (20 copies)	Col_cuticle_N,Collagen	Feminine	73.2341	4.20387	153.183	0	0.166536	0.0776229	61.4031	0.346726	24.8165	0.136676	0.31439	0.0658145
BOKJ_1052500.1	sy867Hm	WtHm	-8.80127	4.7545	2.68379e-20	2.91543e-18				101.473	11.5264	211.05	0	5.99867	1.38915	77.8797	0.255929	30.1372	0.0816415	0.567693	0.27819
BOKJ_0311100.1	sy867Hm	WtHm	-9.24452	5.28175	1.1375e-18	1.06062e-16	structural constituent of cuticle	Col_cuticle_N,Collagen	Feminine	50.4058	3.38692	126.219	0.202771	0	0	64.0847	0.256983	32.6358	0.189887	0	0.0613179
BOKJ_0873900.1	sy867Hm	WtHm	-9.64534	0.817557	1.57377e-09	3.40598e-08				145.501	0	210.975	0	0	0	263.713	1.02912	76.5142	0	0	0
BOKJ_0114700.1	sy867Hm	WtHm	-10.1352	5.67886	2.81743e-17	2.03382e-15				37.2454	1.13944	68.9173	0	0	0.190979	7.56236	0.155537	3.6306	0.041905	0.0505926	0
BOKJ_0740300.1	sy867Hm	WtHm	-10.2386	6.39753	1.17442e-22	1.54595e-20	Nematode cuticle collagen N-terminal domain	Col_cuticle_N,Collagen	Feminine	116.371	7.97176	222.044	0.161952	0	1.1111	121.321	0.139892	43.5039	0.066051	0.178698	0
