# Supplementary material for: Possible stochastic sex determination in Bursaphelenchus nematodes
Source: Nat Commun. 2022 May 11;13:2574. doi: 10.1038/s41467-022-30173-2 (PMC9095866; doi:10.1038/s41467-022-30173-2)
Supplement: Supplementary file 12 — Source Data [file 41467_2022_30173_MOESM12_ESM.xlsx]

## Sheet: Sheet1
Fig. 4d. Body length (μm) in WT and mutant pseudomales.
Individual No.	WT (herma)	WT (male)	sy867	sy868	amu001	amu002
1	860	775	1092	930	885	802
2	883	750	1091	1081	878	764
3	826	760	1042	1033	841	853
4	845	660	1085	936	827	804
5	828	666	1034	1095	829	784
6	883	650	1002	926	785	766
7	838	743	983	1025	817	750
8	862	771	891	923	968	844
9	929	754	1077	981	915	723
10	912	711	1021	1037	979	935
Fig. 4e. Body width (μm) in WT and mutant pseudomales.
Individual No.	WT (herma)	WT (male)	sy867	sy868	amu001	amu002
1	26.9	22.5	31.7	25.1	25.4	29.8
2	28.5	19.7	31.3	29.4	26.3	23.4
3	24.1	19.2	27.6	26.8	24.4	27.2
4	27.6	16	29.8	26.3	21.9	27.1
5	23.9	18.1	27.1	31.2	24.2	23.8
6	29.7	17.8	27.3	20.9	21.9	22.7
7	26.7	20.3	25.3	30.9	30.4	22.5
8	23.8	16.4	26.1	24.8	25.4	22.2
9	29.9	19.3	29.5	26.7	24.5	24.1
10	27.6	18.1	29.1	34.5	27.1	26.9
Fig. 4g. Chemotaxis on WT male and pseudomales in B. okinawaensis to the chemical cue of virgin females of B. xylophilus
Replication	WT (male)	sy867	sy868	amu001	amu002
1	1	0.14	-0.56	0.23	0
2	1	0.07	0.64	0.38	0
3	1	0.25	0.29	0.09	0
4	0.79			0.75
Fig. S6a. Percentage of males in B. okinawaensis on culture media with antibiotics.
Replication	Control	Tetra	Chlo	Kan
1	0.3	0.35	0.41	0.33
2	0.42	0.25	0.38	0.45
3	0.25	0.28	0.15	0.2
4	0.22	0.22	0.12	0.19
5	0.15	0.33	0.17	0.23
6	0.32	0.19	0.39	0.43
7	0.41	0.38	0.47	0.41
8	0.39	0.36	0.29	0.29
9	0.33	0.31	0.3	0.33
10	0.44	0.26	0.45	0.41
